1 **Wheat inositol pyrophosphate kinase TaVIH2-3B modulates cell-wall**  
2 **composition for drought tolerance in Arabidopsis**

3 **Author names and affiliations:**

4 Anuj Shukla<sup>1,2#</sup>, Mandeep Kaur<sup>1#</sup>, Swati Kanwar<sup>1</sup>, Gazaldeep Kaur<sup>1</sup>, Shivani Sharma<sup>1</sup>,  
5 Shubhra Ganguli<sup>3,4</sup>, Vandana Kumari<sup>1</sup>, Koushik Mazumder<sup>1</sup>, Pratima Pandey<sup>5</sup>, Hatem  
6 Rouached<sup>6,7</sup>, Vikas Rishi<sup>1</sup>, Rashna Bhandari<sup>3</sup> and Ajay K Pandey<sup>1,\*</sup>

7

8 <sup>1</sup>National Agri-Food Biotechnology Institute (Department of Biotechnology), Sector 81,  
9 Knowledge City, S.A.S. Nagar, Mohali-140306, Punjab, India.

10 <sup>2</sup>Regional Centre for Biotechnology, Faridabad - 121001 Haryana (NCR Delhi), India

11 <sup>3</sup>Laboratory of Cell Signalling, Centre for DNA Fingerprinting and Diagnostics, Hyderabad  
12 500039, India.

13 <sup>4</sup>Graduate Studies, Manipal Academy of Higher Education, Manipal 576104, India.

14 <sup>5</sup>Department of Biological Sciences, Indian Institute of Education and Research, Mohali  
15 140306.

16 <sup>6</sup>Department of Plant, Soil, and Microbial Sciences, Michigan State University, East Lansing,  
17 MI, USA 48824

18 <sup>7</sup>Plant Resilience Institute, Michigan State University, East Lansing, MI, USA 48824

19 **Short title:** VIH2 involved in imparting drought stress

20 # Authors contributed equally

21 *\*Corresponding author:*

22 Dr. Ajay K Pandey, Scientist-F

23 Email: [pandeyak@nabi.res.in](mailto:pandeyak@nabi.res.in); [pandeyak1974@gmail.com](mailto:pandeyak1974@gmail.com)

24 **ORCID iD:** <https://orcid.org/0000-0003-1064-139X>

25 **Abstract**

26 **Background**

27 Inositol pyrophosphates (PP-InsPs) are high-energy cellular molecules involved in different  
28 signalling and regulatory responses. Two distinct classes of inositol phosphate kinases  
29 responsible for the synthesis of PP-InsPs have been identified in *Arabidopsis* i.e. ITPKinase  
30 (inositol 1,3,4 trisphosphate 5/6 kinase) and PP-IP5Kinase (diphosphoinositol  
31 pentakisphosphate kinases). Plant PP-IP5Ks are capable of synthesizing InsP<sub>8</sub> and were  
32 shown to control pathogenic defence and phosphate response signals. However, other roles  
33 offered by plant PP-IP5Ks, especially towards abiotic stress, remain poorly understood.

34 **Results**

35 Here, we characterized two *Triticum aestivum* L. (hexaploid wheat) PPIP5K  
36 homologs, *TaVIH1* and *TaVIH2*, for their physiological functions. We demonstrated that  
37 wheat VIH proteins could utilize InsP<sub>7</sub> as the substrate to produce InsP<sub>8</sub>, a process that  
38 requires the functional VIH-kinase domains. At the transcriptional level,  
39 both *TaVIH1* and *TaVIH2* are expressed in different wheat tissues, including developing  
40 grains, but show selective response to abiotic stresses during drought-mimic experiments.  
41 Overexpression of *TaVIH2-3B* homolog in *Arabidopsis* conferred tolerance to drought stress  
42 and rescued the sensitivity of *Atvih2* mutants. RNAseq analysis of *TaVIH2-3B* transgenic  
43 lines of *Arabidopsis* showed a genome-wide reprogramming with remarkable effects on cell-  
44 wall biosynthesis genes with enhanced the accumulation of polysaccharides (arabinogalactan,  
45 cellulose and arabinoxylan).

46 **Conclusions**

47 Overall, this work identifies a novel function of VIH proteins, implying their roles in  
48 modulating cell-wall homeostasis genes and providing water-deficit stress tolerance. This  
49 work suggests that the plant VIH enzymes could be linked to drought tolerance and also

50 opens up investigations to address the roles of plant VIH derived products in generating  
51 drought resistant plants.

52

53 **Keywords:** Inositol pyrophosphate kinase, wheat, drought stress, phytic acid, transcriptome,  
54 cell wall

55

## 56 **Background**

57 Inositol phosphates (InsPs) are a well-known family of eukaryotic water-soluble signalling  
58 molecules that are conserved mainly in their function [1, 2]. This family is characterized by  
59 the presence of phosphate either at the single or all the 6-carbon inositol ring backbone. The  
60 full phosphorylated InsPs (InsP<sub>6</sub>; *myo*-inositol-hexakisphosphate, phytic acid) species can  
61 be again phosphorylated to generate high energy Inositol pyrophosphates (PP-InsPs)[3–5].  
62 PP-InsPs are essential members of the inositol poly-phosphate family, with an array of  
63 pyrophosphates chains present at specific positions [6, 7]. The two major members of InsPs,  
64 i.e., InsP<sub>7</sub> and InsP<sub>8</sub>, are present in very low abundance in cells and are synthesized by two  
65 classes of enzymes. The first class of enzyme, inositol hexakisphosphate kinases (IP6Ks),  
66 phosphorylate one of the precursors InsP<sub>6</sub> to form PP-InsP<sub>5</sub> [3, 8]. The second class of enzyme,  
67 diphosphoinositol pentakisphosphate kinases (PP-IP5Ks), phosphorylate InsP<sub>7</sub> to form InsP<sub>8</sub>  
68 /1,5PP-IP<sub>4</sub> [5, 9, 10].

69 During the past two decades, three isoforms of IP6Ks (IP6K1, IP6K2 and IP6K3) and  
70 two PP-IP5K (PP-IP5K1 and PP-IP5K2) were identified in humans and mouse [11, 12]. In  
71 yeast, a single IP6K (also referred to as Kcs1) and a PP-IP5K (also known as Vip1) are  
72 involved in the synthesis of the respective forms of InsP<sub>7</sub> and InsP<sub>8</sub> [5, 10]. These high energy  
73 pyrophosphates participate in cellular activities such as DNA recombination, vacuolar

74 morphology, cell-wall integrity, gene expression, pseudohyphal growth and phosphate  
75 homeostasis as demonstrated in yeast, mice and humans [13–19].

76 Earlier, the presence of high anionic forms of InsP<sub>6</sub> was predicted in plant species  
77 such as barley and potato [20, 21]. However, the quest to identify the plant genes encoding  
78 for these inositol pyrophosphate kinases remained elusive till the identification of two plant  
79 VIP genes from *Arabidopsis* and are present in all available plant genomes [5, 17]. In plants,  
80 VIP-homolog, also referred to as VIH proteins, contains bifunctional domains including  
81 “rim-K” or ATP-grasp superfamily domain at the N-terminal and histidine acid-phosphatase  
82 domain at a C-terminus as in yeast [5, 22–24]. Furthermore, these VIH proteins displayed PP-  
83 IP5K-like activity involving in plant defence response mediated through jasmonate levels  
84 [22].

85 Recent evidence about genetic interaction studies implies that deletion of the VIH1  
86 and VIH2 in *Arabidopsis* affects plant growth and is an integral part of the phosphate (Pi)  
87 response pathway [23]. The enzymatic properties of *Arabidopsis* VIH1 and VIH2 suggest  
88 that both could utilize PP-InsP<sub>5</sub> as a substrate, akin to the human PP-IP5K2 activity [9, 23].  
89 Additionally, these VIH proteins were functionally active and could rescue invasive growth  
90 through hyphae formation in yeast *vip1Δ* mutants [25]. The new line of evidence also  
91 suggested that the generated InsP<sub>8</sub> could bind the eukaryotic SPX domain and thereby  
92 regulate the activity of the phosphate starvation response1 (PHR1), a central regulator of  
93 phosphate (Pi) starvation [17, 23]. The conserved role of VIH kinases in synthesizing PP-  
94 InsP<sub>x</sub> are essential for their role in Pi homeostasis as demonstrated in yeast, humans and  
95 plants [17, 24, 26]. Thus, the role of plant VIH and PP-InsPs need further investigation to  
96 explore their additional molecular functions.

97 In summary, to date, the studies could reveal the function of plant VIH only in  
98 pathogen defence and Pi limiting conditions. Still, no other role has been investigated or

99 reported for these genes in *Arabidopsis* or other crop plants. In the current study, we have  
100 identified two functionally active VIH genes from hexaploid wheat (*Triticum aestivum* L.),  
101 capable of utilizing InsP<sub>7</sub> as a substrate to generate InsP<sub>8</sub>. Hexaploid wheat, an important  
102 crop around the globe and its productivity can be affected when exposed to abiotic stress  
103 [27]. We have done expression studies, physiological investigations accompanied by forward  
104 and reversed genetic approaches; we provide evidence that wheat VIH2 could impart  
105 tolerance to drought in transgenic *Arabidopsis*. Further, we observed that the drought  
106 tolerance was dependent upon distinct transcriptomic re-arrangements in addition to  
107 alterations in the composition of plant cell-wall. Together, our study provides novel insight  
108 into the possible function of plant VIH towards stress tolerance.

109

## 110 **Results**

### 111 **Phylogeny and Spatio-temporal characterization of VIH genes in wheat tissue**

112 Our efforts to identify potential wheat VIH-like sequences revealed six genes with three  
113 homoeolog, which shows 98.8% sequence identity with each other. *TaVIH1* and *TaVIH2*  
114 were mapped to chromosome 3 and 4, respectively. Both the wheat VIH genes were present  
115 on all the three genome-homoeologs (A, B and D). The Kyte-Doolittle hydropathy plots  
116 indicated that wheat VIH proteins were devoid of any transmembrane regions  
117 (Supplementary Figure S1A and Table S1). Phylogenetic analysis clustered plant VIH  
118 homologs together with *TaVIH* proteins close to *Oryza sativa* (~90%) in the monocot  
119 specific clade (Figure 1A). *TaVIH2* is closer to *AtVIH1* and *AtVIH2* in the phylogenetic tree  
120 with an identity of 72% and 33% with *ScVIP1*, respectively. *TaVIH1* reveal a high identity of  
121 78 % with *Arabidopsis* (*AtVIH*) proteins and 35% with yeast (*ScVIP1*) proteins but present  
122 in different clad of the tree (Figure 1A). Among themselves, wheat VIH1 (*TaVIH-1*) and  
123 VIH2 (*TaVIH-2*) show 70% sequence identity at the protein level (Supplementary Figure

124 S2). Amino acid sequence alignment of wheat VIH protein sequences suggested the presence  
125 of conserved dual-domain architecture with two distinct domains consisting of N-terminal  
126 rimK/ATP GRASP fold and a C-terminal histidine acid-phosphatase (HAP) of PP-IP5K/VIP1  
127 family (Supplementary Figure S1B).

128 Transcript accumulation of *TaVIH* genes showed similar expression profiles for both  
129 genes, with the highest expression in leaf tissues followed by flag leaf, root, and slightest  
130 expression in the stem of wheat (Figure 1B). These findings suggest that both VIH genes are  
131 preferentially expressed in leaf (Figure 1B ). The highest expression of both VIH genes was  
132 observed at late stages of grain filling with high transcript accumulation at 28 DAA stage  
133 (Figure 1C). Similar levels of transcript accumulation were found in the remaining grain  
134 tissues, *viz.* embryo, glumes, and rachis, suggesting a ubiquitous expression in these tissues  
135 (Figure 1D). The expression profile in different grain tissues also revealed higher expression  
136 of *TaVIH2* genes in the aleurone layer and endosperm tissue which is ~2-fold higher than  
137 *TaVIH1* (Figure 1D). Thus, our analysis shows differential expression patterns of VIH in  
138 different wheat tissue.

139

#### 140 **Wheat inositol pyrophosphate kinase demonstrates PP-IP<sub>5</sub>K activity**

141 Yeast complementation assay for wheat VIH genes was carried out using yeast growth assay  
142 on SD-Ura plates supplemented with 0, 2.5 and 5 mM 6-azuracil. The expression of both  
143 *TaVIH1*-4D and *TaVIH2*-3B in yeast was confirmed by western blotting (Supplementary  
144 Figure S3A). The wild type strain BY4741 showed an unrestricted growth phenotype,  
145 whereas *vip1Δ* transformed with empty pYES2 vector showed growth sensitivity at 2.5 and  
146 5mM concentrations of 6-azauracil [22] (Supplementary Figure S3A). To our surprise, the  
147 mutant strain transformed with pYES2-*TaVIH1*-4D could not revive growth defect on  
148 selection plates, whereas the pYES2-*TaVIH2*-3B could rescue the growth phenotype of the

149 *vip1Δ* strain. Previous studies show that under stress conditions, unlike wild type yeast,  
150 *vip1Δ* mutant does not form pseudo-hyphae [25]. The complemented *vip1Δ* strain with  
151 pYES2-TaVIH2-3B could also rescue this phenotype during stress by showing hyphae  
152 formation (Supplementary Figure S3B). Overall, our data suggest that *TaVIH2* derived  
153 from the B genome can complement the growth defects of the *vip1Δ* strain.

154 In-vitro kinase assay was performed using the pure protein of VIH-kinase domain  
155 (KD) (Supplementary Figure S4). Firstly, we generated InsP<sub>7</sub> substrate using mouse IP6K1  
156 enzyme using InsP<sub>6</sub>. The synthesized InsP<sub>7</sub> was confirmed by TBE-PAGE gel  
157 (Supplementary Figure S5A), and the gel eluted product was also subjected to MALDI-ToF  
158 (Supplementary Figure S5B). The relative luminescence units (RLU) were recorded for  
159 TaVIH1-KD and TaVIH2-KD using mIP6K1 generated InsP<sub>7</sub> as a substrate (Figure 2A). The  
160 RLU value represents the ADP formed during the kinase reaction. Our assays show a  
161 significant increase in the RLU for both the TaVIH proteins in the presence of InsP<sub>7</sub>  
162 substrate. Among them, the wheat VIH2 showed a high fold luminescence response  
163 compared to the VIH1 protein (Figure 2A). This kinase activity was diminished in VIH post-  
164 heat-denaturation (D-VIH), and the activity was not significantly different when compared to  
165 either Enzyme-control (Ec) or substrate control (InsP<sub>7</sub>) reactions. This conversion of ATP to  
166 ADP can be used as an indirect measurement biosynthesis of InsP<sub>8</sub>.

167 The InsP<sub>8</sub> product generated by the above reactions was confirmed by resolving the  
168 reaction products by TBE-PAGE analysis [28]. To visualize the products on a gel, we used a  
169 higher concentration of InsP<sub>7</sub> substrate. As a control, we used ScVIP1-KD generated InsP<sub>8</sub>  
170 using InsP<sub>7</sub> as a substrate (Figure 2B; lane5). The TaVIH proteins were incubated with InsP<sub>7</sub>  
171 as a substrate for two-time points (1 and 2 hr), and the products were resolved by PAGE. Our  
172 experiments suggest that InsP<sub>8</sub> was synthesized only by TaVIH2-KD when InsP<sub>7</sub> was provided  
173 as a substrate (Figure 2B). During this period of incubation, no detectable levels of the product

174 were seen for the TaVIH1-KD reactions. In contrast, upon a longer incubation with substrates  
175 (~9 hrs), we observed that InsP<sub>8</sub> was generated by both VIH1 and VIH2 proteins  
176 (Supplementary Figure 5C), suggesting that TaVIH1 may have a lower enzyme activity  
177 compared with TaVIH2. To further confirm the nature of generated phosphorylated inositol  
178 molecules, MALDI-ToF- MS was performed. The analysis of the InsP<sub>8</sub> band (generated by  
179 TaVIH2-KD) was done in the m/z range of 500 to 1000, which reveals a significant peak of  
180 820.47 m/z (Supplementary Figure 5D). Here minor peak represents the theoretical mass of  
181 InsP<sub>8</sub> and the prominent peak corresponding to the InsP<sub>8</sub>-acetonitrile adduct. These enzymatic  
182 and analytical experiments confirm that TaVIH2 protein is functionally active and capable of  
183 using InsP<sub>7</sub> as a substrate under in-vitro conditions and may possess PP-IP<sub>5</sub>K like activity.

184

### 185 **Expression of 35S: TaVIH2-3B transgenic *Arabidopsis* display robust growth**

186 The biological functions of TaVIH2 were analyzed by overexpressing the cDNA of TaVIH2-  
187 3B in Columbia (Col-0) *Arabidopsis thaliana*. In total, seven transgenic lines were pre-  
188 selected based on TaVIH2 expression that was analyzed by western analysis (Figure 3A).  
189 Further, four transgenic lines (#Line2-3, #Line 4-3, #Line 5-2 and #Line 6-1) were selected  
190 for characterization. We observed that at the vegetative stage, TaVIH2-3B transgenic  
191 *Arabidopsis* showed robust growth. Plants (14 days old seedlings) showed enhanced rosette  
192 area cover and increased number of leaves as compared to the controls (Col-0 and Col-0Ev  
193 (empty vector))(Figure 3B, C and D). These transgenic *Arabidopsis* also displayed enhanced  
194 branching with an overall increase in the length of the main shoot axis and leaf size as  
195 compared to the controls (Figure 4A and B). Primary and secondary shoot numbers were also  
196 enhanced in the transgenic *Arabidopsis* (Figure 4D). In general, no significant differences  
197 during the flowering stage was observed, yet the increased number of (20-24) secondary  
198 shoots were evident when compared with control plants (12-15 shoots) (Figure 4D and E).



199 These results suggest that the expression of *TaVIH2-3B* in *Arabidopsis* impacts the overall  
200 growth of the plant.

201

### 202 **Wheat *VIH2-3B* respond to drought-mimic stress**

203 To investigate the promoter activities of *TaVIH1* and *TaVIH2*, 5' flanking regions (1 kb) of  
204 these genes were cloned, and the comparative analysis revealed the presence of hormones and  
205 abiotic stress-responsive cis-elements (Supplementary Figure S6A). The presence of these  
206 elements suggested that wheat *VIH* could be regulated by stress. Notably, we observed the  
207 presence of the cis-elements that could respond to drought/dehydration, P1BS (PHR1 binding  
208 site) and GA responsive domains. (Supplementary Figure S6A). This motivated us to perform  
209 preliminary screening experiments using *TaVIH*-promoters fused to  $\beta$ -glucuronidase (GUS)-  
210 reporter gene (*pVIH1/2:GUS*) in *Arabidopsis* (Col-0). A significant increase in GUS reporter  
211 activity of *pVIH2:GUS* lines indicated the ability of this promoter to sense the given stress  
212 and drive GUS reporter expression. Interestingly, the *TaVIH2* promoter responded strongly to  
213 dehydration/drought stress and Pi-starvation (Supplementary Figure S6B). Subsequently, the  
214 GUS was expressed strongly during the presence of 30% PEG (Figure 5A). This suggests the  
215 potential role of *TaVIH2* during the drought response. A weak expression of the *TaVIH2*  
216 promoter was observed in the presence of ABA and GA<sub>3</sub> (Supplementary Figure S6B).  
217 Control (EV) seedlings showed no visible GUS staining. Based on our reporter assays, we  
218 speculate that *TaVIH2* could have an essential role during a drought stress response, which  
219 was investigated further.

220 We tested the gene response to drought-like conditions on plant physiology. Here,  
221 seedlings were exposed to drought-like conditions using mannitol (125 mM) and glycerol (10  
222 %) [29]. No significant difference in the root growth pattern on the ½ MS plates was  
223 observed in all the *Arabidopsis* seedlings (Figure 5B). Inhibition of the root growth was

224 observed for the control *Arabidopsis* suggesting their sensitivity to the presence of both the  
225 mannitol and glycerol (Figure 5B). In contrast, TaVIH2-3B overexpression in *Arabidopsis*  
226 was able to escape the detrimental root growth (Figure 5C). Finally, to check the sensitivity  
227 of *Arabidopsis* *vih2-3/vih2-4* and its rescue by wheat VIH2, we screened the complemented  
228 mutant lines with *TaVIH2-3B* and evaluated it during drought-mimic conditions (Figure 6A).  
229 Interestingly, both *vih2-3* and *vih2-4* showed high sensitivity towards drought mimicking  
230 conditions and this sensitivity was restored to similar to Col0-(EV) when complemented with  
231 *TaVIH2-3B* (Figure 6B and C). These results corroborate the intriguing aspects of TaVIH2  
232 physiological function during drought stress.

233

#### 234 **Wheat VIH2-3B imparts resistance to water-deficit stress**

235 Studying the relative water loss helped us investigate the direct involvement of TaVIH2-3B  
236 in conferring the drought tolerance in the detached leaves. The rate of water loss was very  
237 significant in the control plants compared to the transgenic plants (Figure 7A). This loss was  
238 less in the transgenic *Arabidopsis* (40-46%) when compared to control plants (16-18%) after  
239 8 hrs of incubation (Figure 7A). Next, we measured relative leaf water content (RWC%;  
240 Figure 7B) for these plants. The RWC was high (~65%) in transgenic plants as compared to  
241 the control plants (~46%).

242 Further, drought stress experiments were carried out for all the plants by exposing 7  
243 days old plants to 14 days of water withholding (drought). These experiments were carried  
244 out for the mutant, wild-type and overexpressing plants together in the same pot for ensuring  
245 that they are inter-rooted and exposed to the same soil moisture conditions. After 14 days of  
246 drought, the relative soil moisture content was observed to be as low as 35% in the pots. This  
247 caused a dramatic withering of both control and transgenic *Arabidopsis* plants. However,  
248 when the plants were re-watered, high survival rates (~65 %) were observed in the transgenic

249 plants, whereas no or very low (3%) survival efficiency was observed in control. No survival  
250 was observed for the *vih2-3* mutant plants (Figure 7C), indicating their sensitivity to drought  
251 conditions. This indicates that the transgenic *Arabidopsis* overexpressing TaVIH2 escapes the  
252 effect of drought and improves survival rate by imparting drought tolerance.

253

#### 254 **Transcriptomics data suggest that *VIH2-3B* stimulate genes related to drought stress**

255 In order to understand the basis of robust phenotype and drought resistance observed in the  
256 transgenic *Arabidopsis* plants when complemented with TaVIH2-3B, we used the  
257 transcriptomics approach. Transcriptomics changes in 25 days old seedlings of control and  
258 two transgenic plants (#Line4 and #Line6) were analyzed. PCA of normalized expression  
259 abundances revealed a high level of correlation among biological replicates (n=3) in each  
260 transgenic line. PCA also indicates a distinct cluster for overexpressing transgenic lines and  
261 controls (Supplementary Figure S7A). Based on an analysis involving respective three  
262 biological replicates, a total of 626 and 261 genes were significantly up and down-regulated  
263 ( $-1 > \text{Log FC} > 1.0$ ) in #Line4 while 797 and 273 genes were up and downregulated in #Line6  
264 transgenic *Arabidopsis* lines compared to control plants (Supplementary Table S2). Overall,  
265 605 genes were commonly differentially altered in the two transgenic lines with respect to the  
266 control plants (Col-0(Ev); Figure 8A).

267 Interestingly, a high number of genes constitutively activated in the transgenic  
268 *Arabidopsis* belong to the dehydration response element-binding (DREB) protein, including  
269 Integrase-type DNA-binding superfamily proteins and glycine-rich proteins. Upon analysis of  
270 the GO terms, the highest number of genes for “stress-related” and “cell-wall related  
271 activities” were enriched in the biological process and cellular component categories (Figure  
272 8B and Supplementary Figure S7B). Strikingly, multiple genes involved in cell-wall  
273 biosynthesis, modification and degradation were also up-regulated in the transgenic plants

274 (Figure 9A). In addition to that, distinct clusters of genes involved in Abscisic acid (ABA)  
275 biosynthesis were also significantly up-regulated among the different lines of transgenic  
276 *Arabidopsis* (Figure 9B). Notably, drought-marker genes encoding 9-*cis*-epoxycarotenoid  
277 dioxygenase (*AtNCED6* and *AtNCED9*) involved in ABA biosynthesis were also up-  
278 regulated. Multiple DREB encoding genes and cytochrome P450 (CYPs) related family genes  
279 (*CYP71A23*, *CYP94B3*, *CYP71B12*, *CYP96A2*, *CYP702A1*, *CYP707A3*, *CYP82C2*,  
280 *CYP76G1*, *CYP705A4*, *CYP71B10*, *CYP706A2*, *CYP81D11*) were also differentially  
281 regulated in the transgenic *Arabidopsis* (Figure 9C and D). The expression response of these  
282 genes was also validated by using qRT-PCR analysis. Our expression data strongly supported  
283 the transcriptome observation that reflects the upregulation of multiple genes (Supplementary  
284 Figure S8). These genes validate the abundance of transcripts encoding for DREB, ABA  
285 biosynthesis and CYP sub-family genes in transgenic lines when compared to wild type.  
286 Overall, we conclude that a distinct cluster of genes involved in drought and ABA stress were  
287 significantly up-regulated in these transgenic plants and thus may impart tolerance to stress.

288

### 289 **VIH2 overexpression affects ABA levels and regulates plant cell-wall composition**

290 Multiple genes related to ABA biosynthesis were differentially expressed in TaVIH2-3B  
291 overexpressing *Arabidopsis*. To verify if the de-novo gene expression response to ABA  
292 associated genes could be correlated with its in-vivo levels, ABA was quantified in their  
293 leaves. We observed that the accumulation of ABA was significantly higher (~3-4 fold) in  
294 transgenic *Arabidopsis* when compared to the control plants (Figure 10A). This average  
295 increase of ABA in all the four transgenic lines was statistically significant ( $p < 0.0001$ ,  
296 Student's t-test). Our data confirmed the involvement of ABA in the drought tolerance of  
297 transgenic lines.

298 Our results have revealed the function of TaVIH2-3B in drought stress. To draw the  
299 commonality between our gene expression in TaVIH2-3B overexpressing *Arabidopsis* and  
300 drought, we analyzed previously reported RNAseq data SRA: SRP075287 (under drought  
301 stress) for overlap of de-regulated genes. In total, 295 and 309 genes were commonly  
302 regulated in #Line4 and #Line6 when compared with drought data (Figure 10B and  
303 Supplementary Table S3). Most of the listed genes that were commonly regulated belong to  
304 the category of hormone metabolism, signalling, stress response, development and cell-wall  
305 functions (Figure 10C). Multiple genes NCEDs, CYPs and glycosyltransferases were highly  
306 enriched in the dataset (Supplementary Table S3). These extended analyses support the  
307 notion that TaVIH2-3B could impart activation of genes pertaining to drought in transgenic  
308 plants that could impart basal drought resistance. Since cell-wall plays a significant role in  
309 imparting drought resistance, we, therefore, measured different cell-wall components of  
310 control and transgenic *Arabidopsis*. Using standard extraction methods resulted in  
311 comparable yields from all the tested plants, and the presence of starch was ruled out before  
312 performing experiments. Our extraction procedures for control plants show the ratio of 1::1.2  
313 to 1.5 for arabinose/galactose and arabinose/xylans. This validates our extraction procedures.  
314 Our analysis indicated a consistent increase in the accumulation of cellulose (from 1.3 to 2.5-  
315 fold) in the transgenic lines that were the same among the biological replicates and multiple  
316 transgenic lines (Figure 10D). Additionally, arabinoxylan (AX) and arabinogalactan (AG)  
317 was also increased (1.8- 2.2 and 1.47- 1.5-fold) in the transgenic lines as compared to the  
318 controls (Figure 10D). To further validate the role of VIH proteins, the *Atvih2-3* mutant line  
319 was used for measuring the biochemical composition of the shoots cell-wall (Figure 10D).  
320 Our analysis showed a significant reduction of the AG, AX and cellulose content in this  
321 mutant line when compared to transgenic lines (Figure 10D). Our data demonstrate that

322 overexpression of wheat *VIH2-3B* resulted in changes in the cell-wall composition, and these  
323 changes could be linked to the enhanced drought response in leaves.

324

## 325 **Discussion**

326 Recently, studies investigating inositol pyrophosphates have gained much attention due to the  
327 presence of high energy pyrophosphate moieties speculated to regulate metabolic  
328 homeostasis in organisms [22, 25, 30–32]. This study was performed to characterize and  
329 identify the functional mechanism of *VIH* proteins involved in the biosynthesis of PP-InsPx.  
330 We have characterized two wheat inositol pyrophosphate kinase (*TaVIH1* and *TaVIH2*)  
331 encoding genes and demonstrated that homoeolog wheat *VIH2-3B* in *Arabidopsis* could  
332 enhance growth and provide tolerance to drought stress. Our line of evidence shows that this  
333 tolerance to drought is a result of the ability of *VIH* to modulate cell-wall and ABA related  
334 genes resulting in the changes in the cell-wall polysaccharide composition (AG, AX and  
335 cellulose).

336 Hexaploid bread wheat has one of the most complex genomes comprising of three  
337 related sub-genomes that have originated from three separate diploid ancestors, thus forming  
338 an allohexaploid genome [33, 34]. Therefore, to consider the appropriate homoeolog-  
339 transcript for further studies, the Wheat-Exp expression database was used to analyze *VIH2-3B*  
340 homoeolog expression in different tissues and also during the developmental time course  
341 (Supplementary Figure S9A). Plant *VIHs* are known to be involved in defence response via a  
342 jasmonate-dependent resistance in *Arabidopsis* [22]. Wheat *VIH* genes were also induced  
343 upon infection of plants with pathogens (Supplementary Figure S9B and C). Thus, the role of  
344 plant *VIH* genes during plant-microbe interaction was found to be conserved. *TaVIH* protein  
345 was an authentic kinase protein since its kinase domain could catalyze phosphorylation and  
346 harbours yeast *VIP1*-like activity, as demonstrated by its utilization of *InsP<sub>7</sub>* as a substrate. In

347 the past, AtVIH proteins possess kinase activity that generates different isoforms of InsP<sub>7</sub> [22,  
348 25]. Earlier, it was suggested that *Arabidopsis* VIH2 executes Vip1/PP-IP5K but not  
349 Kcs1/IP6K-like activities in yeast [22]. This observation confirms the conserved kinase  
350 activity among the plants with high substrate affinity for InsP<sub>7</sub> [35]. Similarly, yeast and  
351 human enzymes also show differential InsP<sub>6</sub> and InsP<sub>7</sub> kinase activity [5, 36, 37]. We tested  
352 InsP<sub>7</sub> as a substrate for wheat VIH proteins where TaVIH2 shows more specificity towards  
353 InsP<sub>7</sub> that suggest PP-IP5K like activity generating InsP<sub>8</sub> (Figure 2B). Intriguingly, our time-  
354 dependent assays and the RLU value, which reflects the conversion of InsP<sub>7</sub> to InsP<sub>8</sub>, could  
355 account for the different affinity of wheat VIH proteins (Figure 2A and B). Interestingly,  
356 AtVIH1 and AtVIH2 show a high identity (89.8 %) at the protein level whereas, specifically  
357 TaVIH1-4D and TaVIH2-3B arising from two different chromosomes show 72 % identity.  
358 VIH protein alignment of Arabidopsis and wheat suggest the presence of the conserved  
359 residues required for protein-substrate (5-InsP<sub>7</sub>) interactions (Supplementary Figure S2).  
360 Although, the conserved-catalytic residues remain same in both the wheat VIH proteins, we  
361 could still see changes in the protein sequences in the N-terminal ATP-grasp domains. Wheat  
362 genome encodes a total of six VIH proteins that remains to be tested if they could vary in the  
363 affinity to utilize the respective substrates. These apparent differences could be intriguing that  
364 requires further biochemical investigations.

365 The presence of various *cis*-acting elements in the promoter region plays an  
366 essential role in the transcriptional regulation of genes in response to multiple  
367 environmental factors. Our transcriptional activity of *TaVIH2-3B* promoter and expression  
368 analysis links TaVIH2-3B with Pi-starvation response (Supplementary Figure S2). This  
369 function of inositol pyrophosphate kinases in the regulation of Pi homeostasis seems to be  
370 evolutionarily conserved [31, 37]. In Arabidopsis, it was recently demonstrated that VIH  
371 derived InsP<sub>8</sub> is required to sense the cellular Pi status and binds to the intracellular Pi sensor

372 SPX1 to control Pi homeostasis in plants [24]. We found that in addition to Pi homeostasis,  
373 the *TaVIH2-3B* promoter also responds to drought conditions.

374 Earlier, the double mutants of VIH genes in *Arabidopsis* show severe growth defects,  
375 implicating their unexplored role in overall growth and development[23]. We hypothesize  
376 that the molecular and biochemical changes in transgenic *Arabidopsis* provide the overall  
377 mechanical strength to the plant cell and, in turn, tolerance to stress conditions. These  
378 observations were also supported by our transcriptome analysis of two independent *TaVIH2-*  
379 *3B* overexpressing *Arabidopsis* lines that show consistent high expression of cell-wall, ABA  
380 and DREB genes (Figure 8 and Figure 9B). Multiple genes were differentially regulated by  
381 *TaVIH2-3B* overexpression, suggesting that increased protein levels of VIH2 could cause  
382 changes in gene expression patterns. Classically, VIH proteins contains evolutionarily  
383 conserved two distinct domains, including an N terminal rimK/ATP GRASP kinase and  
384 phosphatase domain. It remains to be dissected if the change in transcriptome response in  
385 these transgenic *Arabidopsis* is due to the kinase or phosphatase domain. Earlier, multiple  
386 inositol-1,3,4 triskisphosphate 5/6-kinase (devoid of phosphatase domain) was also  
387 implicated for their role in drought tolerance[38, 39]. This may suggest that the tolerance for  
388 the drought could arise by the presence of the functional kinase domain.

389 Multiple studies have implicated that an enhanced level of ABA leads to drought  
390 tolerance[40–43]. The elevated levels of ABA in our transgenic plants could be accounted for  
391 the high expression of genes involved in cell-wall maintenance and biosynthesis. In yeast role  
392 of inositol pyrophosphate kinase was also implicated in vacuolar morphology and cell-wall  
393 integrity[14]. Plant cell-wall related remodelling and ABA regulated signalling is the primary  
394 response against abiotic stress, including drought[41, 42, 44]. ABA-dependent increased  
395 expression of NCEDs, *CYPs* and *DREBP* have been reported earlier in plants with their role  
396 implicated in drought stress[40, 43, 45]. Our study shows a high basal expression of genes



397 encoding for DREBP and CYPs (Figure 8C). The high constitutive expression of these gene  
398 families in our transgenic *Arabidopsis* could account for their better adaptability for drought  
399 stress (Figure 8A, B and C). ABA is an important phytohormone regulating plant growth,  
400 development, and stress responses [46, 47]. At the mechanistic level ABA could target  
401 downstream genes that are able to support plant growth even under non-stress condition [48].  
402 In our case high ABA levels could be as a result of such homeostatic interaction with other  
403 hormones; although this needs to be confirm in future. Additionally, the high expression of  
404 the sub-set of NCEDs and DREB genes could also be accounted for ABA regulated  
405 signalling in transgenic *Arabidopsis*. Similarly, overexpression of NCED could result in high  
406 accumulation of ABA[49, 50]. Earlier, changes in cellular levels of InsP<sub>7</sub> and InsP<sub>8</sub> have been  
407 attributed to guard cell signalling, ABA sensitivity and resistance to drought in maize *mrp5*  
408 mutants[31, 51]. This suggests a molecular link between TaVIH2, ABA levels and drought  
409 resistance. Resolving the in-vivo levels of InsP<sub>x</sub> is technically challenging for non-  
410 specialized labs. Our current study is limited due to the lack of in vivo measurements of InsP<sub>8</sub>  
411 in these transgenic lines. In-vivo profiling of InsP<sub>x</sub> by enrichment with TiO<sub>2</sub> is a powerful  
412 tool that has been employed with plant tissue [23, 24, 52]. We are currently optimizing this  
413 method to detect the InsP<sub>x</sub> generated in our transgenic lines. However, TaVIH2-3B showed  
414 the highest homology to AtVIH2 (70.6 %) and both show PP-IP5K like activity. Therefore,  
415 we speculate that these transgenic plants may possess high levels of InsP<sub>8</sub>.

416 *Atvih2-3* mutant lines lacking mRNA expression also show alteration in the cell-wall  
417 composition despite its typical growth as wild type Col-0 (Figure 9D). Interestingly, *vih1* and  
418 *vih2* double mutants display severe growth defect that was rescued by the gene  
419 complementation [23]. In our study, we complemented the *vih2-3* *Arabidopsis* mutant with  
420 the TaVIH2-3B that resulted in restoring Col-0(Ev) like phenotype. This suggests that wheat

421 VIH2-3B could functionally complement *Arabidopsis vih2* mutants, and it is possible that the  
422 in-vivo level of InsP<sub>8</sub> is restored in these lines since both bear PPIP5K activity.

423 Our overexpression data showing enhanced branching and robust growth collectively  
424 reinforce the notion that VIH are also involved in providing support for plant growth. The  
425 *vih2* mutant in *Arabidopsis* is more susceptible to infestation by caterpillar (*Pieris rapae*) and  
426 thrips[22]. The resistance against herbivore pathogens such as *P. rapae* could be gained by  
427 modulating the genes associated with cell-wall modification[53]. *Arabidopsis vih2* lines  
428 showed compositional changes in the cell-wall extracted polysaccharides, especially at the  
429 AG level. The decreased resistance in *vih2* mutants against herbivores could be accounted for  
430 the defect in the signalling pathway via COI1-dependent gene regulation and changes in the  
431 structural composition of the cell-wall. Taken together, we propose a working model, where  
432 wheat VIH participate in the drought resistance in plants by modulating the changes in cell-  
433 wall gene expression, enhanced ABA levels and change in biochemical composition to  
434 provide more mechanical strength (Figure 10E). In future, it will be interesting to quantitate  
435 the level of higher inositol pyrophosphates in these plants.

436

## 437 **Conclusions**

438 Herein, we explored additional roles offered by plant VIH proteins. We employed genetic  
439 and biochemical tools to characterize the wheat homoeolog VIH2-3B as an active PP-IP5K.  
440 Our lines of evidence suggest that the expression of VIH genes is perturbed during drought  
441 conditions and could modulate the expression of genes involved in cell-wall maintenance so  
442 as to relay resistance to both mimic-drought and drought conditions. Interestingly, the wheat  
443 VIH2 was able to complement the *vih2-3/2-4* which were also sensitive to mimic-drought  
444 like condition. In summary, our work provides a glimpse into the emerging new role of plant  
445 VIH proteins in cell-wall scaffolding functions to provide resistance against drought stress.

446 Future studies will be required to dissect the casual effect of drought response that could be  
447 mediated at the protein level by the VIH2 or levels of InsPx species in these transgenic lines.

448

## 449 **Methods**

### 450 **Plant materials and growth conditions**

451 The experiments in this study were conducted using *Arabidopsis thaliana* variety Col-0  
452 ecotype and Bread wheat (*Triticum aestivum* L.) variety “C-306” (Mishra et al., 20201). For  
453 the collection of the tissue materials, the spikes tagged on the first day after anthesis (DAA),  
454 post which samples were collected at 7, 14, 21 and 28 DAA stages and various tissues,  
455 including root, stem, leaf and flag leaf of 14 DAA stage. For seed tissue collection 14 DAA  
456 seed was used to separate different tissues, including aleurone, endosperm, embryo, glumes  
457 and rachis as mentioned previously [54].

458

### 459 **Identification and cloning of two wheat VIH genes**

460 Two *Arabidopsis* (AT5G15070.2 and AT3G01310.2) and the previously reported yeast VIP1  
461 sequences were used to perform Blastx analysis against the IWGSC  
462 ([www.wheatgenome.org/](http://www.wheatgenome.org/)). The identified sequences were analyzed for the presence of the  
463 typical dual-domain structure. Furthermore, the Pfam domain identifiers of the signature  
464 ATP-Grasp Kinase (PF08443) and Histidine Acid Phosphatase (PF00328) domains were used  
465 to identify VIH proteins in the Ensembl database using the BioMart application. The  
466 corresponding predicted homoeologous transcripts were found and compared to the other  
467 VIH sequences. DNA STAR Lasergene 11 Core Suite was used to perform the multiple  
468 sequence alignment and calculate the sequence similarity. Gene-specific primers capable of  
469 amplifying the transcript from the specific genome was designed after performing 5' and 3'-  
470 RACE to ascertain the completed open reading frame (ORF). Subsequently, full-length

471 primers were designed to amplify the *VIH* genes. The generated full-length sequence  
472 information was further used for qRT-PCR related studies.

473

#### 474 **Hydropathy plot and IDR prediction**

475 The hydropathy profile for proteins was calculated according to Kyte and Doolittle., 1982.

476 The positive values indicate hydrophobic domains, and negative values represent hydrophilic

477 regions of the amino acid residues. To identify the % similarity with IDR boundaries, MFDp2

478 (<http://biomine.cs.vcu.edu/servers/MFDp2> was used to predict the disorder content in the

479 input sequence[55].

480

#### 481 **Isolation of total RNA, cDNA synthesis and quantitative real-time PCR analysis**

482 Total RNA from various tissues was extracted by a manual method using TRIzol® Reagent

483 (Invitrogen™). The integrity and concentration of RNA were measured, and

484 contamination of genomic DNA was removed by subjecting the RNA samples to DNase

485 treatment using TURBO™ DNase (Ambion, Life Technologies). 2 µg of total RNA was

486 used for cDNA preparation using The Invitrogen SuperScript III First-Strand Synthesis

487 System SuperMix (Thermo Fisher Scientific) as per the manufacturer's guidelines. qRT-PCR

488 was performed using the QuantiTect SYBR Green RT-PCR Kit (Qiagen, Germany). The

489 gene-specific primers capable of amplifying 150-250 bp region from all the three

490 homoeologous of two *TaVIH* genes were carefully designed using Oligocalc software. Four

491 technical replicates for each set of primers and a minimum of two to three experimental

492 replicates were used to validate the experiment. Gene-specific primer (with similar primer

493 efficiencies) used in the study are listed in Supplementary Table S4. ADP-ribosylation factor

494 gene (*TaARF*) was used as an internal control in all the expression studies. The Ct values

495 obtained after the run were normalized against the internal control, and relative expression  
496 was quantified using the  $2^{-\Delta\Delta C_T}$  method [56].

497 For In-silico expression for *TaVIH* genes, the RefSeq IDs were used to extract  
498 expression values as TPMs from the expVIP database. For different tissues and stages, the  
499 expression values were used to build a heatmap. In the case of abiotic and biotic stress  
500 conditions, the expression values from the control and stressed conditions were used to get  
501 fold change values, which were then used to plot heatmaps using MeV software.

502

### 503 **Construct preparation for expression vector and yeast functional complementation**

504 For complementation assays, pYES2, a galactose-inducible yeast expression vector, was  
505 used. The functional complementation of yeast by TaVIH proteins (with C-myc tag) was  
506 studied using 6-azauracil based assay. The wild type BY4741 (MATa; his3D1; leu2D0;  
507 met15D0; ura3D0) and *vip1Δ* (BY4741; MATa; ura3Δ0; leu2Δ0; his3Δ1; met15Δ0;  
508 YLR410w::kanMX4) yeast strains were used for the growth assays. The CDS corresponding to  
509 the catalytic domain of *ScVIP1* (1-535 amino acids) cloned into pYES2 expression vector was  
510 used as a positive control. *TaVIH1/2*, along with *ScVIP1* and empty vector, were transformed  
511 individually into wild type and mutant strains by the lithium acetate method with slight  
512 modifications. The expression of both TaVIH1-4D and TaVIH2-3B in yeast was confirmed  
513 by Western blotting using Anti C-myc antibody (1:1000; raised in mice; Invitrogen, USA).  
514 For growth assay, the wild type and mutant *S. cerevisiae* strains carrying different plasmids  
515 were allowed to grow overnight in minimal media without uracil. The primary culture was used  
516 to re-inoculate fresh media to an OD<sub>600</sub> of 0.1 and grow until the culture attained an optical  
517 density of 0.6-0.8. The cell cultures were then adjusted to O.D of 1 and further serially diluted  
518 to the final concentrations of 1:10, 1:100 and 1:1000. 10 μl each of these cell suspensions were  
519 used for spotting on SD(-Ura) plates containing 2% galactose, 1% raffinose and varying

520 concentrations of 6-azauracil (0, 2.5 and 5 mM). The colony plates were incubated at 30°C, and  
521 pictures were taken after four days.

522

523 **Protein expression of wheat VIH1 and VIH2, In-Vitro Kinase assays, PAGE analysis**  
524 **and MADLI-ToF analysis**

525 The TaVIH1-KD and TaVIH2-KD were cloned in pET-28a and expressed in *E. coli* BL21  
526 cells using 0.5 mM IPTG and purified in lysis buffer having pH 7.4 containing 50 mM  
527 sodium phosphate, 300 mM NaCl and protein inhibitor cocktail. Post sonication and  
528 centrifugation purification was done on the Cobalt resin affinity chromatography column  
529 (ThermoFisher Scientific, Waltham, MA, USA). After column saturation overnight at 4°C, it  
530 was washed with buffer containing 7.5 mM imidazole and subsequently eluted with buffer  
531 containing 100 mM EDTA. The eluate was pooled and concentrated using a concentrator  
532 having a molecular weight cut-off of 10 kDa by spinning at conditions mentioned in the  
533 vivaspin concentrator's manual. The concentrated enzyme preparation was washed thrice  
534 with sodium phosphate buffer and finally concentrated in Tris-HCl buffer, pH 7.4. Purified  
535 proteins were analyzed by western blotting with Mouse anti-HIS primary antibody and Goat  
536 anti-Mouse secondary antibody [HRP IgG (H + L): 1:5000 dilutions; Invitrogen].

537 Kinase assays were performed using the ADP-Glo™ Max Assay kit (Promega, USA)  
538 according to the manufacturer's guidelines. This kit utilizes the luminescence-based test for  
539 ADP quantification as a measure of kinase activity. We prepared InsP<sub>7</sub> by using 100ng of  
540 Mouse IP6K1 (mIP6K1) recombinant protein along with 100 μM of InsP<sub>6</sub> (Sigma, USA) in a  
541 buffer containing 20 mM HEPES (pH 7.5), 5 mM MgCl<sub>2</sub>, 10 mM ATP and 1 mM DTT for 3  
542 hr at 28°C. The resultant product was first resolved by TBE-PAGE gel and then eluted from  
543 the gel as described earlier [57] and was used for the reaction. The concentration of the eluted  
544 InsP<sub>7</sub> was measured with ImageJ software by comparing with varying InsP<sub>6</sub> concentrations in

545 the TBE PAGE gels[57]. For ADP-Glo™ Max Assay kit 50 ng of respective protein (VIH1  
546 and VIH2) and 300 nM InsP<sub>7</sub> and 1μM of ATP was used, and the assay was conducted by  
547 following the manufacturer's guidelines. Luminescence was measured one hour after adding  
548 the ADP-Glo™ Max Detection Reagent, using SpectraMax M5e plate reader (Molecular  
549 Devices, USA).

550 For resolving the InsP<sub>x</sub> species generated by TaVIH1 and TaVIH2, separate kinase  
551 assays were performed in 20 mM HEPES (pH 7.5), 5 mM MgCl<sub>2</sub>, 10 mM ATP, 100 μM  
552 InsP<sub>7</sub> and 1 mM DTT and incubated along with 30 ng of respective proteins in a total volume  
553 of 100μl. ScVIP1 was taken as a control for the reaction. These reactions were incubated at  
554 28°C for 1, 2 or 9 hrs. The reaction products were separated by TBE-PAGE and visualized by  
555 Toluidine Blue staining. All the inositol polyphosphates were resolved using 18 cm gel using  
556 33.3 % polyacrylamide gel in Tris-Borate EDTA, as mentioned earlier [28]. These gels were  
557 pre-run for 75 min at 300 volts, and the samples were mixed with dye (10 mM Tris-HCl pH  
558 7.0; 1 mM EDTA; 30 % glycerol; 0.08 % Orange G) and loaded. Gels were run at 5-6 mA  
559 overnight at 4°C until the Orange G dye front reached 6 cm from the bottom of the gel. Bands  
560 were subsequently visualized by Toluidine Blue (0.1 % w/v) stain. TBE-PAGE gel-purified  
561 products of TaVIH reaction were used for Matrix-assisted laser desorption-Time Of flight  
562 Mass Spectrometry analysis (MALDI-ToF-MS). MALDI-ToF-MS was performed from gel  
563 extract solutions which were pipetted on an α-Cyano-4-hydroxycinnamic acid (≥98%, Sigma)  
564 prepared on a stainless-steel plate (0.5 μL of a 10 mg/mL ACN/H<sub>2</sub>O 1:1 solution). Negative  
565 ionization mode was used for acquiring spectra on a spectrometer (AB SCIEX TOF/TOF™  
566 5800; equipped with a 337 nm laser) operating in the linear mode.

567

568 **Cloning of VIH promoter, cDNA and *Arabidopsis* transformation**

569 For promoter, ~2000 bp fragments upstream of the start codon were PCR amplified from  
570 genomic DNA. The cloned DNA fragments (in pJET1.2) were sequenced, confirmed and  
571 inserted into pCAMBIA1391z, a promoter-less binary vector containing GUS reporter gene  
572 to generate *TaVIHpromoter: GUS* in pCAMBIA1391z. For *VIH2-3B* cDNA (3117 bp) fused  
573 C-terminal His tag, site-directed cloning was done at *Spe1* generated site in pCAMBIA1302  
574 (pCAMBIA1302:*TaVIH*-His). These generated transcription units were introduced into  
575 *Arabidopsis* seedlings, or T-DNA insertion lines of *vih2-3* (SAIL\_165\_F12), *vih2-4* (GK-  
576 080A07) mutant using *Agrobacterium tumefaciens* (GV3101) mediated transformation by  
577 floral dip method (Zhang, Henriques, Lin, Niu & Chua 2006). Multiple (7-10) independent  
578 transformants were screened on 0.5X MS media containing 30 mg/L hygromycin and 0.8%  
579 agar. The transformed seedlings with long hypocotyls and green expanded leaves at a 4-leaf  
580 stage were separated from the non-transformed seedlings and transferred to the soil after  
581 about three weeks. Similarly, T<sub>1</sub> and T<sub>2</sub> generation seeds were also selected and allowed to  
582 grow till maturity. The transgenic seedlings were confirmed for the presence of recombinant  
583 cassette using PCR based approach. The transgenic lines harbouring empty pCAMBIA1391Z  
584 or pCAMBIA1302 vector was used as a respective negative control. The PCR positive lines  
585 were further used for functional characterization. In addition, the promoter sequences of  
586 *TaVIH* genes were analyzed for the presence of cis-regulatory elements using the  
587 PLANTCARE database (<http://bioinformatics.psb.ugent.be/webtools/plantcare/>).

588

#### 589 **GUS-reporter assays and characterization of transgenic lines in *Arabidopsis***

590 For promoter analysis, the seeds of PCR positive lines were surface sterilized and grown on  
591 0.5X MS (Murashige and Skoog media) agar plates containing 30 mg/L Hygromycin B for  
592 15 days before they were subjected to various abiotic stress and hormonal treatments. For  
593 dehydration stress, the seedlings were air-dried by placing them on Whatman filter paper for



594 1hr. Exposure to ABA (100  $\mu$ M), GA<sub>3</sub> (20  $\mu$ M) and drought-mimic (20% and 30% PEG)  
595 were given by placing the seedlings on filter paper impregnated with 0.5X MS solution  
596 containing the respective chemical for 24 hrs. For Pi starvation, seedlings were allowed to  
597 grow on MS agar plates without KH<sub>2</sub>PO<sub>4</sub> for 96 hrs. Histochemical staining of seedlings after  
598 respective treatments were performed by incubated overnight in GUS staining solution  
599 (Jefferson 1987) with 2 mM X-Gluc (5-bromo-4-chloro-3-indolyl-beta-D-glucuronic acid,  
600 HiMedia, India) at 37 °C in a 48-well microplate containing about ten seedlings/well.  
601 Chlorophyll was removed from tissues by dipping in 90% ethanol. The staining was  
602 visualized and photographed under Leica DFC295 stereomicroscope (Wetzlar, Germany) at a  
603 magnification of 63X. MS solution without any chemical served as a control.

604 For characterization of transgenic lines parameters such as rosette area, the number of  
605 leaves, leaves size, length of central root axis and number of shoots (primary and secondary).  
606 Four independent confirmed homozygous transgenic lines were used for this study. Each  
607 parameter was calculated using three experimental replicates, each consisting of twelve  
608 plants. For drought-mimic stress experiments, three days old seedlings of transgenic and  
609 control pre-grown on 0.5X MS were transferred to 0.5X MS plates consisting of either 125-  
610 or 100-mM mannitol or 5 or 10 % glycerol. Ten seedlings were used, and the experiments  
611 were repeated three times with similar phenotypes. For control, seedlings continued to grow  
612 on ½ MS plates. Root lengths were measured, graphs were plotted (using three experimental  
613 replicates), and pictures were taken after nine days of growth. The relative water loss % was  
614 calculated of twenty-five leaves per five plants with a similar developmental stage for each of  
615 the transgenic lines, and control plants were subjected to incubation (27 °C) for the period of  
616 8 hrs. The fresh weight of the detached leaf was taken and continued for the measurements  
617 every 2 hrs. The experiment was repeated twice for similar observations. The leaf relative  
618 water content (RWC) measurement was performed as mentioned earlier [41]. The value for

619 each treatment was calculated by using the standard formula  $RWC (\%) = [(FW-DW)/(TW-$   
620  $DW)] \times 100$  with FW is fresh weight, DW is dry weight, and TW is turgor weight. For  
621 performing these experiments, leaves of equal sizes were detached from 24 days old  
622 transgenic lines and control *Arabidopsis* and weighed immediately (FW). The leaves were  
623 submerged in deionized water for 24 hrs. After incubation, the leaves were blotted dry, and  
624 their weight was determined (TW). To measure their DW, they were oven-dried (at 65°C) for  
625 24 hrs. The experiments were performed with at least three experimental replicates, each  
626 consisting of five to six plants.

627 For drought response, the seedlings were grown in a symmetrical box with  
628 demarcated sections for each seedling. The seedlings were inter-rooted so that they are  
629 exposed to similar soil moisture conditions. The seven days old seedlings of *Arabidopsis*  
630 were subjected to drought (water-withholding) conditions for the period of fourteen days.  
631 After the drought period, the seedlings were re-watered, and observations were made after 4  
632 and 7 days. Post this, the plants were observed, and % survival rates were calculated.

633

#### 634 **RNAseq profiling**

635 Col-0(Ev) and overexpressing *TaVIH2-3B* *Arabidopsis* (#Line4 and 6) seedlings were grown  
636 for 25 days. Total RNA was extracted from three independent biological replicates for each  
637 genotype using RNeasy Plant Mini Kits (Qiagen, CA). Genomic DNA contamination was  
638 removed by digestion with Turbo DNase (BioRad, CA). RNA quantity was checked by  
639 Bioanalyzer for quality control (RIN>8). Library construction and sequencing were  
640 performed by Eurofins, Bangalore, India, using pair-end library preparation. About 9.5 to  
641 13.8 million raw reads were obtained for each sample. Raw reads were processed to filter out  
642 the adapter, and low quality (QV<20) reads using trimmomatic v0.39[58]. The reads were  
643 then pseudo-aligned against the reference transcriptome (Ensembl release 48) using Kallisto

644 v0.46.2 [59]. The obtained raw abundances were summarised to gene-level expression counts  
645 using tximport and imported to DESeq2 [60, 61] for differential expression (DE) analysis in  
646 R. The obtained log<sub>2</sub> fold change (LFC) values were further processed using apeglm package  
647 to reduce noise [26]. Genes with  $1 > \text{LFC} < -1$  and  $\text{padj} < 0.05$  were considered significantly  
648 DE. The expression correlation across lines and within replicates was analyzed using  
649 Principal Component Analysis (PCA) in ggplot2 [62]. The data have been deposited in the  
650 NCBI as a Bioproject ID PRJNA685929.

651

### 652 **GC-MS analysis of Arabidopsis cell-wall polysaccharides and ABA measurement**

653 Extraction of cell-wall components was performed as described earlier with minor  
654 modification as depicted in the flowchart as Supplementary Figure S10 [63]. Since such  
655 chemical analysis requires relatively large amounts of samples, pools from 3-5 independent  
656 plants (for each of the three biological replicates) of the respective lines expressing wheat  
657 VIH2-3B were used for chemical analysis. Briefly, five grams (fresh weight) of shoots from  
658 respective lines and control at similar developmental stages (25 days old) was crushed to a  
659 fine powder and processed further. The derived pellet was used to extract arabinoxylan (AX)  
660 and cellulose, whereas the supernatant was used to extract arabinogalactan (AG). The  
661 extractions were checked with Iodine solution to make sure that they are free of starch  
662 interference. The compositional analysis of the extracted AG, AX and Cellulose was  
663 determined by preparing their alditol derivatives and process for gas chromatography-mass  
664 spectrometry (GC-MS) analysis as described [64, 65]. Two  $\mu\text{l}$  of samples were introduced in  
665 the splitless injection mode in DB-5 (60 m  $\times$  0.25 mm, 1  $\mu\text{m}$  film thickness, Agilent, CA)  
666 using helium as a carrier gas. The alditol acetate derivative was separated using the following  
667 temperature gradient: 80 °C for 2 min, 80-170 °C at 30°C/min, 170-240 °C at 4°C/min, 240  
668 °C held for 30 min and the samples were ionized by electrons impact at 70 eV. ABA was

669 measured using Plant Hormone Abscisic Acid (ABA) ELISA kit (Real Gene, Germany).  
670 Twenty-five days old plants leaves were used for the measurement of the ABA content. One  
671 gram of fresh weight from eight plants for each line was used for extractions. The  
672 experiments were repeated with at least three independent extractions, and concentration was  
673 calculated using standard graphs as per the manual instructions. Standard graph and test  
674 samples were plotted using a log of concentration, and colour development for each line was  
675 measured at 430 nm (Supplementary Figure S11A and B).

#### 676 **Funding**

677 This study was supported by the Department of Biotechnology, Basic Plant Biology Grant to  
678 AKP [BT/PR12432/BPA/118/35/2014].

#### 679 **Acknowledgements**

680 Authors thank Executive Director for facilities and support. Part of this work was also  
681 supported by the NABI-CORE grant to AKP. MK thanks UGC-CSIR for her research  
682 scholarship. Thanks to Dr Gabriel Schaff for sharing the *Arabidopsis vih2-3* and *vih2-4* T-DNA  
683 insertion mutant. AS thank DBT for the SRF fellowship. DBT-eLibrary Consortium  
684 (DeLCON) is acknowledged for providing timely support and access to e-resources for this  
685 work.

#### 686 **Availability of data and materials**

687 All data generated or analyzed during this study are included in this published article and its  
688 supplementary information files. The resources, including plasmids, constructs, and transgenic  
689 *Arabidopsis* seeds, will be available upon reasonable request.

#### 690 **Contributions**

691 AS, AKP, RB, PP, MB, HR and VR wrote the text and drafted the figures; AS, SK, KM,  
692 AKP, MB, RB, SG and VK designed and conducted the establishment experiments; GK,  
693 AKP and AS conducted the RNAseq experiments and analyzed the data. AS, MB and SS

694 performed reporter assays and transgenic related work; AS performed PAGE assays, RB and  
695 SG assisted in the analysis of inositol polyphosphates by PAGE. All authors read and  
696 approved the final manuscript. AKP acquired the funding from the extramural agency.

697 **Ethics approval and consent to participate**

698 Not applicable.

699 **Consent for publication**

700 Not applicable.

701 **Competing interests**

702 The authors declare that they have no competing interests.

703

704

705 **References:**

706 1. Irvine RF. Inositide evolution - towards turtle domination? *J Physiol.* 2005;566 Pt 2:295–  
707 300. doi:10.1113/jphysiol.2005.087387.

708 2. Tsui MM, York JD. Roles of inositol phosphates and inositol pyrophosphates in  
709 development, cell signaling and nuclear processes. *Adv Enzyme Regul.* 2010;50:324–37.  
710 doi:10.1016/j.advenzreg.2009.12.002.

711 3. Saiardi A, Erdjument-Bromage H, Snowman AM, Tempst P, Snyder SH. Synthesis of  
712 diphosphoinositol pentakisphosphate by a newly identified family of higher inositol  
713 polyphosphate kinases. *Curr Biol.* 1999;9:1323–6. doi:https://doi.org/10.1016/S0960-  
714 9822(00)80055-X.

715 4. Saiardi A, Nagata E, Luo HR, Snowman AM, Snyder SH. Identification and  
716 Characterization of a Novel Inositol Hexakisphosphate Kinase. *J Biol Chem.*  
717 2001;276:39179–85. doi:10.1074/jbc.m106842200.

718 5. Mulugu S, Bai W, Fridy P, Bastidas R, Otto J, Dollins D, et al. A Conserved Family of

- 719 Enzymes That Phosphorylate Inositol Hexakisphosphate. *Science*. 2007;316:106–9.
- 720 6. Draškovič P, Saiardi A, Bhandari R, Burton A, Ilc G, Kovačević M, et al. Inositol  
721 Hexakisphosphate Kinase Products Contain Diphosphate and Triphosphate Groups. *Chem*  
722 *Biol*. 2008;15:274–86. doi:10.1016/j.chembiol.2008.01.011.
- 723 7. Laha D, Portela-Torres P, Desfougères Y, Saiardi A. Inositol phosphate kinases in the  
724 eukaryote landscape. *Adv Biol Regul*. 2021;79:100782.  
725 doi:<https://doi.org/10.1016/j.jbior.2020.100782>.
- 726 8. Voglmaier SM, Bembenek ME, Kaplin AI, Dormán G, Olszewski JD, Prestwich GD, et al.  
727 Purified inositol hexakisphosphate kinase is an ATP synthase: diphosphoinositol  
728 pentakisphosphate as a high-energy phosphate donor. *Proc Natl Acad Sci U S A*.  
729 1996;93:4305–10. doi:10.1073/pnas.93.9.4305.
- 730 9. Choi JH, Williams J, Cho J, Falck JR, Shears SB. Purification, sequencing, and molecular  
731 identification of a mammalian PP-InsP5 kinase that is activated when cells are exposed to  
732 hyperosmotic stress. *J Biol Chem*. 2007;282:30763–75. doi:10.1074/jbc.M704655200.
- 733 10. Fridy PC, Otto JC, Dollins DE, York JD. Cloning and Characterization of Two Human  
734 VIP1-like Inositol Hexakisphosphate and Diphosphoinositol Pentakisphosphate Kinases. *J*  
735 *Biol Chem*. 2007;282:30754–62. doi:10.1074/jbc.m704656200.
- 736 11. Menniti FS, Oliver KG, Putney JW, Shears SB. Inositol phosphates and cell signaling:  
737 new views of InsP5 and InsP6. *Trends Biochem Sci*. 1993;18:53–6.  
738 doi:[https://doi.org/10.1016/0968-0004\(93\)90053-P](https://doi.org/10.1016/0968-0004(93)90053-P).
- 739 12. Stephens L, Radenberg T, Thiel U, Vogel G, Khoo KH, Dell A, et al. The detection,  
740 purification, structural characterization, and metabolism of diphosphoinositol  
741 pentakisphosphate(s) and bisdiphosphoinositol tetrakisphosphate(s). *J Biol Chem*.  
742 1993;268:4009–15. doi:10.1016/s0021-9258(18)53571-7.
- 743 13. Luo HR, Saiardi A, Yu H, Nagata E, Ye K, Snyder SH. Inositol Pyrophosphates Are

- 744 Required for DNA Hyperrecombination in Protein Kinase C1 Mutant Yeast†. *Biochemistry*.  
745 2002;41:2509–15. doi:10.1021/bi0118153.
- 746 14. Dubois E, Scherens B, Vierendeels F, Ho MMW, Messenguy F, Shears SB. In  
747 *Saccharomyces cerevisiae*, the Inositol Polyphosphate Kinase Activity of Kcs1p Is Required  
748 for Resistance to Salt Stress, Cell Wall Integrity, and Vacuolar Morphogenesis. *J Biol Chem*.  
749 2002;277:23755–63. doi:10.1074/jbc.m202206200.
- 750 15. Saiardi A. Phosphorylation of Proteins by Inositol Pyrophosphates. *Science* (80- ).  
751 2004;306:2101–5. doi:10.1126/science.1103344.
- 752 16. Auesukaree C, Tochio H, Shirakawa M, Kaneko Y, Harashima S. Plc1p, Arg82p, and  
753 Kcs1p, Enzymes Involved in Inositol Pyrophosphate Synthesis, Are Essential for Phosphate  
754 Regulation and Polyphosphate Accumulation in *Saccharomyces cerevisiae*. *J Biol Chem*.  
755 2005;280:25127–33. doi:10.1074/jbc.m414579200.
- 756 17. Wild R, Gerasimaite R, Jung J-Y, Truffault V, Pavlovic I, Schmidt A, et al. Control of  
757 eukaryotic phosphate homeostasis by inositol polyphosphate sensor domains. *Science* (80- ).  
758 2016;352:986. doi:10.1126/science.aad9858.
- 759 18. Norman KL, Shively CA, De La Rocha AJ, Mutlu N, Basu S, Cullen PJ, et al. Inositol  
760 polyphosphates regulate and predict yeast pseudohyphal growth phenotypes. *PLoS Genet*.  
761 2018;14:e1007493–e1007493. doi:10.1371/journal.pgen.1007493.
- 762 19. Wilson MS, Jessen HJ, Saiardi A. The inositol hexakisphosphate kinases IP6K1 and -2  
763 regulate human cellular phosphate homeostasis, including XPR1-mediated phosphate export.  
764 *J Biol Chem*. 2019;294:11597–608. doi:10.1074/jbc.RA119.007848.
- 765 20. Lemtiri-Chlieh F, MacRobbie EA, Brearley CA. Inositol hexakisphosphate is a  
766 physiological signal regulating the K<sup>+</sup>-inward rectifying conductance in guard cells. *Proc*  
767 *Natl Acad Sci U S A*. 2000;97:8687–92. doi:10.1073/pnas.140217497.
- 768 21. Dorsch JA, Cook A, Young KA, Anderson JM, Bauman AT, Volkmann CJ, et al. Seed

- 769 phosphorus and inositol phosphate phenotype of barley low phytic acid genotypes.  
770 *Phytochemistry*. 2003;62:691–706. doi:10.1016/s0031-9422(02)00610-6.
- 771 22. Laha D, Johnen P, Azevedo C, Dynowski M, Weiß M, Capolicchio S, et al. VIH2  
772 Regulates the Synthesis of Inositol Pyrophosphate InsP8 and Jasmonate-Dependent Defenses  
773 in Arabidopsis. *Plant Cell*. 2015;27:1082–97. doi:10.1105/tpc.114.135160.
- 774 23. Zhu J, Lau K, Puschmann R, Harmel RK, Zhang Y, Pries V, et al. Two bifunctional  
775 inositol pyrophosphate kinases/phosphatases control plant phosphate homeostasis. *Elife*.  
776 2019;8:e43582. doi:10.7554/eLife.43582.
- 777 24. Dong J, Ma G, Sui L, Wei M, Satheesh V, Zhang R, et al. Inositol Pyrophosphate InsP8  
778 Acts as an Intracellular Phosphate Signal in Arabidopsis. *Mol Plant*. 2019;12:1463–73.  
779 doi:10.1016/j.molp.2019.08.002.
- 780 25. Desai M, Rangarajan P, Donahue JL, Williams SP, Land ES, Mandal MK, et al. Two  
781 inositol hexakisphosphate kinases drive inositol pyrophosphate synthesis in plants. *Plant J*.  
782 2014;80:642–53. doi:10.1111/tpj.12669.
- 783 26. Zhu A, Ibrahim JG, Love MI. Heavy-tailed prior distributions for sequence count data:  
784 removing the noise and preserving large differences. *Bioinformatics*. 2019;35:2084–92.  
785 doi:10.1093/bioinformatics/bty895.
- 786 27. Hura T. Wheat and Barley: Acclimatization to Abiotic and Biotic Stress. *Int J Mol Sci*.  
787 2020;21:7423. doi:10.3390/ijms21197423.
- 788 28. Losito O, Szijgyarto Z, Resnick AC, Saiardi A. Inositol pyrophosphates and their unique  
789 metabolic complexity: analysis by gel electrophoresis. *PLoS One*. 2009;4:e5580–e5580.  
790 doi:10.1371/journal.pone.0005580.
- 791 29. Yuan X, Li Y, Liu S, Xia F, Li X, Qi B. Accumulation of eicosapolyenoic acids enhances  
792 sensitivity to abscisic acid and mitigates the effects of drought in transgenic Arabidopsis  
793 thaliana. *J Exp Bot*. 2014;65:1637–49. doi:10.1093/jxb/eru031.



- 794 30. Chakraborty A, Kim S, Snyder SH. Inositol pyrophosphates as mammalian cell signals.  
795 *Sci Signal*. 2011;4:re1–re1. doi:10.1126/scisignal.2001958.
- 796 31. Williams SP, Gillaspay GE, Perera IY. Biosynthesis and possible functions of inositol  
797 pyrophosphates in plants. *Front Plant Sci*. 2015;6:67. doi:10.3389/fpls.2015.00067.
- 798 32. Jadav RS, Chanduri MVL, Sengupta S, Bhandari R. Inositol pyrophosphate synthesis by  
799 inositol hexakisphosphate kinase 1 is required for homologous recombination repair. *J Biol*  
800 *Chem*. 2013;288:3312–21. doi:10.1074/jbc.M112.396556.
- 801 33. Huang S, Sirikhachornkit A, Su X, Faris J, Gill B, Haselkorn R, et al. Genes encoding  
802 plastid acetyl-CoA carboxylase and 3-phosphoglycerate kinase of the *Triticum/Aegilops*  
803 complex and the evolutionary history of polyploid wheat. *Proc Natl Acad Sci U S A*.  
804 2002;99:8133–8. doi:10.1073/pnas.072223799.
- 805 34. Dvorak J, Akhunov ED. Tempos of gene locus deletions and duplications and their  
806 relationship to recombination rate during diploid and polyploid evolution in the *Aegilops-*  
807 *Triticum* alliance. *Genetics*. 2005;171:323–32. doi:10.1534/genetics.105.041632.
- 808 35. Adepoju O, Williams SP, Craige B, Cridland CA, Sharpe AK, Brown AM, et al. Inositol  
809 Trisphosphate Kinase and Diphosphoinositol Pentakisphosphate Kinase Enzymes Constitute  
810 the Inositol Pyrophosphate Synthesis Pathway in Plants. *bioRxiv*. 2019;:724914.  
811 doi:10.1101/724914.
- 812 36. Choi K, Mollapour E, Shears SB. Signal transduction during environmental stress: InsP8  
813 operates within highly restricted contexts. *Cell Signal*. 2005;17:1533–41.  
814 doi:10.1016/j.cellsig.2005.03.021.
- 815 37. Lee Y-S, Mulugu S, York JD, O’Shea EK. Regulation of a cyclin-CDK-CDK inhibitor  
816 complex by inositol pyrophosphates. *Science*. 2007;316:109–12.  
817 doi:10.1126/science.1139080.
- 818 38. Du H, Liu L, You L, Yang M, He Y, Li X, et al. Characterization of an inositol 1,3,4-

- 819    triphosphate 5/6-kinase gene that is essential for drought and salt stress responses in rice.  
820    Plant Mol Biol. 2011;77:547–63. doi:10.1007/s11103-011-9830-9.
- 821    39. Marathe A, Krishnan V, Vinutha T, Dahuja A, Jolly M, Sachdev A. Exploring the role of  
822    Inositol 1,3,4-triphosphate 5/6 kinase-2 ( GmITPK2 ) as a dehydration and salinity stress  
823    regulator in Glycine max (L.) Merr. through heterologous expression in E. coli. Plant Physiol  
824    Biochem. 2018;123:331–41. doi:10.1016/j.plaphy.2017.12.026.
- 825    40. Daszkowska-Golec A, Szarejko I. The Molecular Basis of ABA-Mediated Plant Response  
826    to Drought. Abiotic Stress - Plant Responses and Applications in Agriculture. 2013.  
827    doi:10.5772/53128.
- 828    41. Moore JP, Vitré-Gibouin M, Farrant JM, Driouich A. Adaptations of higher plant cell  
829    walls to water loss: drought vs desiccation. Physiol Plant. 2008;134:237–45.  
830    doi:10.1111/j.1399-3054.2008.01134.x.
- 831    42. Takahashi F, Kuromori T, Urano K, Yamaguchi-Shinozaki K, Shinozaki K. Drought  
832    Stress Responses and Resistance in Plants: From Cellular Responses to Long-Distance  
833    Intercellular Communication. Front Plant Sci. 2020;11:556972.  
834    doi:10.3389/fpls.2020.556972.
- 835    43. Shinozaki K, Yamaguchi-Shinozaki K. Gene networks involved in drought stress  
836    response and tolerance. J Exp Bot. 2006;58:221–7. doi:10.1093/jxb/erl164.
- 837    44. Tenhaken R. Cell wall remodeling under abiotic stress. Front Plant Sci. 2015;5:771.  
838    doi:10.3389/fpls.2014.00771.
- 839    45. Pandian BA, Sathishraj R, Djanaguiraman M, Prasad PVV, Jugulam M. Role of  
840    Cytochrome P450 Enzymes in Plant Stress Response. Antioxidants (Basel, Switzerland).  
841    2020;9:454. doi:10.3390/antiox9050454.
- 842    46. Shinozaki K, Yamaguchi-Shinozaki K. Molecular responses to dehydration and low  
843    temperature: differences and cross-talk between two stress signaling pathways. Curr Opin

- 844 Plant Biol. 2000;3:217–23. doi:[https://doi.org/10.1016/S1369-5266\(00\)80068-0](https://doi.org/10.1016/S1369-5266(00)80068-0).
- 845 47. Schroeder JI, Kwak JM, Allen GJ. Guard cell abscisic acid signalling and engineering  
846 drought hardiness in plants. Nature. 2001;410:327–30. doi:10.1038/35066500.
- 847 48. Hwang S-G, Chen H-C, Huang W-Y, Yu-Chun C, Shii C-T, Cheng W-H. Ectopic  
848 expression of rice OsNCED3 in Arabidopsis increases ABA level and alters leaf morphology.  
849 Plant Sci - PLANT SCI. 2010;178:12–22.
- 850 49. Qin X, Zeevaart JAD. Overexpression of a 9-cis-epoxycarotenoid dioxygenase gene in  
851 Nicotiana plumbaginifolia increases abscisic acid and phaseic acid levels and enhances  
852 drought tolerance. Plant Physiol. 2002;128:544–51.
- 853 50. Iuchi S, Kobayashi M, Taji T, Naramoto M, Seki M, Kato T, et al. Regulation of drought  
854 tolerance by gene manipulation of 9-cis-epoxycarotenoid dioxygenase, a key enzyme in  
855 abscisic acid biosynthesis in Arabidopsis. Plant J. 2001;27:325–33.
- 856 51. Klein M, Perfus-Barbeoch L, Frelet A, Gaedeke N, Reinhardt D, Mueller-Roeber B, et al.  
857 The plant multidrug resistance ABC transporter AtMRP5 is involved in guard cell hormonal  
858 signalling and water use. Plant J. 2003;33:119–29. doi:10.1046/j.1365-313x.2003.016012.x.
- 859 52. Wilson MSC, Bulley SJ, Pisani F, Irvine RF, Saiardi A. A novel method for the  
860 purification of inositol phosphates from biological samples reveals that no phytate is present  
861 in human plasma or urine. Open Biol. 2015;5:150014. doi:10.1098/rsob.150014.
- 862 53. De Vos M, Denekamp M, Dicke M, Vuylsteke M, Van Loon L, Smeeckens SC, et al. The  
863 Arabidopsis thaliana Transcription Factor AtMYB102 Functions in Defense Against the  
864 Insect Herbivore Pieris rapae. Plant Signal Behav. 2006;1:305–11. doi:10.4161/psb.1.6.3512.
- 865 54. Shukla V, Kaur M, Aggarwal S, Bhati KK, Kaur J, Mantri S, et al. Tissue specific  
866 transcript profiling of wheat phosphate transporter genes and its association with phosphate  
867 allocation in grains. Sci Rep. 2016;6:39293. doi:10.1038/srep39293.
- 868 55. Mizianty MJ, Stach W, Chen K, Kedarisetti KD, Disfani FM, Kurgan L. Improved

- 869 sequence-based prediction of disordered regions with multilayer fusion of multiple  
870 information sources. *Bioinformatics*. 2010;26:i489–96. doi:10.1093/bioinformatics/btq373.
- 871 56. Livak KJ, Schmittgen TD. Analysis of Relative Gene Expression Data Using Real-Time  
872 Quantitative PCR and the  $2^{-\Delta\Delta CT}$  Method. *Methods*. 2001;25:402–8.  
873 doi:10.1006/meth.2001.1262.
- 874 57. Loss O, Azevedo C, Szijgyarto Z, Bosch D, Saiardi A. Preparation of quality inositol  
875 pyrophosphates. *J Vis Exp*. 2011;;e3027–e3027. doi:10.3791/3027.
- 876 58. Bolger AM, Lohse M, Usadel B. Trimmomatic: a flexible trimmer for Illumina sequence  
877 data. *Bioinformatics*. 2014;30:2114–20. doi:10.1093/bioinformatics/btu170.
- 878 59. Bray NL, Pimentel H, Melsted P, Pachter L. Erratum: Near-optimal probabilistic RNA-  
879 seq quantification. *Nat Biotechnol*. 2016;34:888–888. doi:10.1038/nbt0816-888d.
- 880 60. Love MI, Huber W, Anders S. Moderated estimation of fold change and dispersion for  
881 RNA-seq data with DESeq2. *Genome Biol*. 2014;15:550. doi:10.1186/s13059-014-0550-8.
- 882 61. Soneson C, Love MI, Robinson MD. Differential analyses for RNA-seq: transcript-level  
883 estimates improve gene-level inferences. *F1000Research*. 2015;4:1521.  
884 doi:10.12688/f1000research.7563.2.
- 885 62. Gómez-Rubio V. ggplot2 - Elegant Graphics for Data Analysis (2nd Edition). *J Stat*  
886 *Softw*. 2017;77 Book Review 2. doi:10.18637/jss.v077.b02.
- 887 63. Zablackis E, Huang J, Müller B, Darvill AG, Albersheim P. Characterization of the cell-  
888 wall polysaccharides of *Arabidopsis thaliana* leaves. *Plant Physiol*. 1995;107:1129–38.  
889 doi:10.1104/pp.107.4.1129.
- 890 64. Blakeney AB, Harris PJ, Henry RJ, Stone BA. A simple and rapid preparation of alditol  
891 acetates for monosaccharide analysis. *Carbohydr Res*. 1983;113:291–9. doi:10.1016/0008-  
892 6215(83)88244-5.
- 893 65. Bhagia S, Nunez A, Wyman CE, Kumar R. Robustness of two-step acid hydrolysis

894 procedure for composition analysis of poplar. *Bioresour Technol.* 2016;216:1077–82.

895 doi:10.1016/j.biortech.2016.04.138.

896

897 **Figure :**

898 **Figure 1. Neighbourhood-Joining phylogenetic tree and expression analysis of wheat**

899 **genes encoding VIH.** (A) Neighbourhood-Joining phylogenetic tree of PP-InsP<sub>5</sub> proteins.

900 The full-length amino acid sequences of VIH proteins from various taxonomic groups were

901 used for the construction of phylogeny using MEGA7.0. The number represents the

902 bootstraps values (1000 replicates). For construction of evolutionary history was inferred by

903 Minimum Evolution method using 14 amino acids sequences spanning from all the wheat

904 VIH homoeologs (*TaVIH1* and *TaVIH2*), rice (Os01t04777700; Os03t0689100), *Arabidopsis*

905 *thaliana* (NP\_568308; NP\_186780), human (HsVIP1-NP\_001124330 and HsVIP2-

906 NP\_001263206), yeast (VIP1-NP\_013514) and *Dictyostelium discoideum* (DDBXP638433)

907 (B) *TaVIH1* and *TaVIH2* in different tissues of a wheat plant. The cDNA was prepared from

908 2µg of DNA free-RNA isolated from root, stem, leaf and flag leaf tissues of a 14 DAA plant

909 as a template. (C) Quantitative expression analysis of *TaVIH* genes at different seed

910 maturation stages (7, 14, 21 and 28 days after anthesis and; (D) Expression in the tissue of 14

911 DAA seed (aleurone, Al; endosperm, En; embryo, Em; glumes, Gl and rachis, Ra. For qRT-

912 PCR, cDNA was prepared from 2µg of DNA-free RNA isolated from respective tissues.

913 *TaARF* was used as an internal control for the normalization of Ct values. Standard deviation

914 was calculated along with its level of significance at  $p < 0.05$  (\*) with respect to the first

915 tissue.

916

917 **Figure 2: Enzymatic activity and analysis of the PP-InsP on PAGE.** (A) The relative

918 luminescence units for all reactions performed were recorded using Spectramax optical

919 reader. The kinase reactions were performed using 50 ng of TaVIH1-KD and TaVIH2-KD  
920 purified proteins for 30 mins, followed by steps mentioned in the ADP-GLO kit. (B)  
921 Visualization of PP-InsP products on the PAGE-GEL (33%). The In-vitro kinase reactions  
922 were performed using 30 ng of ScVIP1-KD, TaVIH1-KD and TaVIH2-KD purified proteins  
923 for 1 and 2 hr at 28°C. The reactions were then resolved on the gels (TBE-PAGE). The photo  
924 was taken after staining by Toluidine Blue.

925

926 **Figure 3: Generation of VIH2-3B transgenic Arabidopsis and its characterization.** (A)  
927 Western analysis and screening of Col-0 Arabidopsis transgenic lines for TaVIH2-3B protein  
928 (~100 kDa) overexpressing lines. Multiple transgenic lines were screened, and Western was  
929 done using His-Antibody using 20µg of total protein. Coomassie Blue stain of the total  
930 protein (lower panel) was used as a loading control. (B) Representative picture of the rosette  
931 area of the Transgenic Arabidopsis (#Line2, #Line4, #Line5 and #Line6) and controls. (C)  
932 Rosette area measurement (in cm<sup>2</sup>) using Image-J for 4 different transgenic lines along with  
933 the controls. Measurement was taken after 14 days of growth. (D) Number of Rosette leaves  
934 in transgenic Arabidopsis and control lines. Three experimental replicates using 10 plants  
935 each were used to calculate the parameters.

936 **Figure 4: Morphological characterization of VIH2-3B transgenic Arabidopsis** (A)  
937 representative phenotype of transgenic Arabidopsis and controls post 25 days of growth  
938 (flowering stage). (B) length of the main axis. (C) leaves size (in mm). (D) Phenotype for the  
939 shoots of the transgenic Arabidopsis and controls. The panel indicates the morphological  
940 differences in the number of primary shoots (as indicated by arrows) among the lines. (E) A  
941 number of total shoots (primary and secondary shoots) in transgenic Arabidopsis and control  
942 plants (right panel). For each transgenic line, three experimental replicates were performed  
943 using 10 plants each.

944

945 **Figure 5: Drought-mimic stress for VIH2-3B *Arabidopsis* transgenic lines** (A) Reporter  
946 assays using promTaVIH2:GUS transgenic lines subjected to drought-mimic (30% PEG).  
947 Seedlings with or without treatment (control) were stained overnight in GUS staining solution  
948 and photographed using Leica stereomicroscope at 6.3X magnification. (B) Transgenic  
949 *Arabidopsis* and control seedlings were subjected to drought mimic conditions with glycerol-  
950 10 % and mannitol-125 mM. Ten seedlings were used for each transgenic line for each  
951 treatment. These experiments were repeated in three experimental replicates with a similar  
952 phenotype. (C) Root length of treated seedlings (in mm) for all the lines. Twenty seedlings  
953 were used for the measurement of root length for each line.

954

955 **Figure 6: Complementation of *vih2-3* line and its characterization.** (A) Western analysis  
956 of *vih2* mutant lines (*vih2-3* and *vih2-4*) complemented with *TaVIH2-3B*. Multiple transgenic  
957 lines were screened and Western was done using His-Antibody using 20 µg of total protein.  
958 Coomassie Blue stain of the total protein (lower panel) was used as a loading control. (B)  
959 Transgenic *Arabidopsis*, *mutant* and Col-0 seedlings were subjected to drought mimic  
960 conditions with glycerol-5 % and Mannitol-100 mM (for moderate mimic-drought). Eight to  
961 ten seedlings were used for each transgenic lines for each treatment. (C) Root length in mm  
962 (n=20). These experiments were repeated three experimental replicates with similar  
963 phenotype.

964

965 **Figure 7: Drought response of VIH2-3B *Arabidopsis* transgenic lines** (A) Relative water  
966 loss in *Arabidopsis* leaves post 8 hrs. Three experimental replicates, each with ten leaves,  
967 were used to calculate the water loss %. (B) Leaf relative water content was measured after  
968 24 days of growth. (C) Drought treatment of soil-grown plants. Seedlings were pre-grown

969 for the period of fourteen days were subjected to drought for additional fourteen days. The  
970 plants were then re-watered for a period of seven days, and % survival rates were calculated.  
971 This experiment was repeated twice. Representative pictures were taken post seven days of  
972 re-watering.

973

974 **Figure 8: RNAseq analysis of Col-0 and #Line4 and 6.** (A) Expression pattern (as Z-  
975 scores) of top 56 genes commonly up-regulated among the transgenic lines w.r.t. Col-0(Ev)  
976 in 25 days old seedlings. Heatmap depicts the relative expression in Col-0(Ev) and over-  
977 expressing lines of *TaVIH2-3B* (3 biological replicates; rep1-3). (B) Heatmap representing a  
978 graphical summary of the Gene Ontology (GO) classification for DEGs in #Line4 and #Line6  
979 w.r.t. Control plants. Increasing intensities of brown and blue colours represent the  
980 comparatively low and high expression for each gene, as depicted by the colour scale.  
981 Normalized expression counts were used to plotting the expression as Z-scores using  
982 heatmap. Two functions from the *gplots* package in R. Significantly altered GO terms were  
983 identified using the Classification SuperViewer tool; the x-axis represents the GO terms  
984 where bold terms represent significant alteration while the y-axis represents the normed  
985 frequency which when  $> 1$  signifies over-representation while  $< 1$  signifies under-  
986 representation.

987 **Figure 9: Heatmap expression analysis of gene families in Col-0(Ev) overexpressing**  
988 ***TaVIH2-3B* Arabidopsis (#Line4 and 6).** (A) Heatmaps for expression patterns (as Z-  
989 scores) for genes DE in both transgenic lines w.r.t. Col-0(Ev), encoding for the genes  
990 involved in cell-wall homeostasis. (B) ABA biosynthesis-related pathway genes. (C) DREB  
991 encoding genes. (D) cytochrome P450 (CYPs) genes. Increasing intensities of brown and  
992 blue colours represent the comparatively low and high expression for each gene, as depicted  
993 by the colour scale. Normalized expression counts were used to plotting the expression as Z-



994 scores using heatmap. Two functions from the *gplots* package (Warnes et al., 2005) in R.  
995 Genes encoding for respective pathways were extracted using MapMan (Thimm et al., 2004).  
996 R1, R2 and R3 represent the biological replicates for the RNAseq analysis of the individual  
997 lines.

998

999 **Figure 10: ABA and polysaccharides composition of Arabidopsis shoots.** (A) ABA  
1000 measurement in the leaves of transgenic Arabidopsis overexpressing VIH2-3B and control  
1001 plants. (B) Venn diagram representation for the genes differentially regulated by drought  
1002 stress, and transgenic lines #Line4 and #Line6 w.r.t. respective Controls. Drought responsive  
1003 genes were shortlisted using the Cufflinks pipeline after processing the datasets for 10 days of  
1004 drought stress and control. (C) Mapman pathway analysis using Classification SuperViewer  
1005 for the genes that are commonly regulated by drought stress (SRA: SRP075287) as well as  
1006 transgenic lines w.r.t. control plants (#Line4 and 6). Bold terms represent significant  
1007 pathways; normed frequency > 1 signifies over-representation while < 1 signifies under-  
1008 representation. (D) For cell-wall composition analysis, wild-type Col-0, *Arabidopsis*  
1009 overexpressing TaVIH2-3B (Line#2, 4, 5 and 6) and *Arabidopsis vih2-3* representing  
1010 Arabidopsis mutant defective for the expression of AtVIH2 were used. Total AG:  
1011 arabinogalactan, AX: arabinoxylan and cellulose (in  $\mu\text{g/g}$ ) were measured as indicated in  
1012 Methods. Analyses were made in triplicates, with each experimental replicate representing at  
1013 least five plants for each genotype. Vertical bars represent the standard deviation. \* on the bar  
1014 indicates that the mean is significantly different at  $p < 0.001$  (#at  $p < 0.05$ ) with respect to their  
1015 respective control plants. (E) Speculative model for the working of VIH2 to impart drought  
1016 resistance to plants

1017

1018 **Supplementary Figure:**

1019 **Supplementary Figure S1:** Kyte-Doolittle Hydropathy plots and conserved domains of  
1020 wheat VIH proteins. (A) Kyte-Doolittle hydropathy plots with the positive values indicating  
1021 the hydrophobic domains and negative values represent hydrophilic regions of the amino acid  
1022 residues. The hydropathy profile for proteins was calculated according to Kyte and Doolittle.,  
1023 1982. (B) Schematic representation of domain architecture of TaVIHs deduced from CDD  
1024 database: light grey rectangles indicate ATP Grasp/RimK Kinase domain and dark grey  
1025 coloured hexagon corresponds to Histidine Phosphatase superfamily.

1026

1027 **Supplementary Figure S2:** Multiple Sequence Alignment (MSA) of different VIH/Vip  
1028 protein sequences (TaVIH1, TaVIH2, AtVIH1, AtVIH2 and ScVip1). The red sequence  
1029 shows high conservation of the amino acids. The single green line indicates rimK/ATP-Grasp  
1030 Kinase domain, and the double green line indicates Histidine Phosphatase Domains (HAPs).

1031

1032 **Supplementary Figure S3:** Yeast complementation assays of wheat VIHs. (A) Total protein  
1033 was extracted from yeast cell transformed with TaVIH1-4D (C-myc tag) and TaVIH2-3B (C-  
1034 myc tag) and Western analysis was done (left panel). Representative image of spotting assay  
1035 performed on SD-Ura plates containing 1% raffinose, 2% galactose and supplemented with 0,  
1036 2.5 and 5mM of 6-azauracil (right panel). The wild type BY4741 and *vip1Δ* strains were  
1037 transformed with respective constructs using Li-acetate method. Representative images were  
1038 taken 4 days after the spotting assay was performed. Similar results were obtained with three  
1039 independent repeats. (B) Filamentous growth assays were observed for wild type yeast (WT),  
1040 yeast mutant- *vip1Δ* with empty pYES2 (*vip1Δ*) and *TaVIH2-3B* complementation in *vip1Δ*-  
1041 (*TaVIH2-3B*+  $\Delta$ *vip1*). Pictures were taken 20 days post-incubation.

1042

1043 **Supplementary Figure S4:** Protein purification and western analysis of wheat TaVIH1-KD  
1044 and TaVIH2-KD. The molecular weight is around 40 kDa . Both the VIH proteins (VIH1 and  
1045 VIH2) were expressed and purified as mentioned in the Methods section, and the expression  
1046 was confirmed by the Western analysis using His-antibody.

1047

1048 **Supplementary Figure S5:** (A) PAGE-gel (33%) analysis of mIP6K1 generated product by  
1049 staining with Toluidine Blue. Substrate InsP<sub>6</sub> without and with ATP (2.5, 5 and 10 mM) was  
1050 used as a control. The product InsP<sub>7</sub> was generated using mIP6K1 and InsP<sub>6</sub> as a substrate  
1051 (last lane). (B) The InsP<sub>7</sub> generated by mIP6K1 was eluted from gel and MS analysis was  
1052 done which indicated a signal at m/z of 740.3 that correspond to mass of InsP<sub>7</sub> and matches  
1053 with the expected generated species. Indicated by arrow. (C) The kinase reactions were  
1054 performed using 30 ng of TaVIH1-KD, and TaVIH2-KD purified proteins for 9 hr at 28° C.  
1055 (D) MALDI-ToF MS analysis of synthesized InsP<sub>8</sub> for TaVIH2-3B KD. MS analysis  
1056 indicated a significant signal at m/z of 820.47 that correspond to the mass of InsP<sub>8</sub>. Indicated  
1057 by arrow.

1058

1059 **Supplementary Figure S6:** Hormonal and abiotic stress response of *TaVIH* genes promoter.  
1060 (A) Cis-element analysis of VIH1 and VIH2 promoters (~1kb) Multiple stress related  
1061 domains are represented in a schematic form. (B) Representative images for histochemical  
1062 GUS assay performed against different stresses for promTaVIH1:GUS and  
1063 promTaVIH2:GUS transgenic lines raised in *Arabidopsis thaliana* Col-0 background. Two  
1064 week old seedlings selected positive against hygromycin selection on 0.5XMS agar plates  
1065 were subjected to respective treatments: drought (20% PEG), dehydration (1hr air drying),  
1066 ABA (100μM), GA<sub>3</sub> (20μM) and Pi-deficiency (0.5X MS medias without KH<sub>2</sub>PO<sub>4</sub>).

1067 Seedlings with or without treatment (control) were stained overnight in GUS staining solution  
1068 and photographed using Leica stereomicroscope at 6.3X magnification.

1069

1070 **Supplementary Figure S7: RNAseq analysis of transgenic Arabidopsis.** (A) PCA analysis  
1071 of the RNAseq for control (Col-0 (Ev)) and two transgenic Arabidopsis lines. (B) Map man  
1072 analysis of the genes those are consistently represented in the two transgenic Arabidopsis  
1073 lines with overexpressing TaVIH2-3B.

1074

1075 **Supplementary Fig. S8: qRT-PCR validation of selected genes from the Col-0(Ev), #Line4**  
1076 **and #Line6.** A total of 2 µg of RNA (DNA free) was used for cDNA synthesis and qRT-PCR  
1077 was performed using gene specific primers (Supplementary Table S4).  $C_t$  values were  
1078 normalized against wheat *ARF1* as an internal control.

1079

1080 **Supplementary Figure S9: Expression patterns of *TaVIH* gene homoeologous in different**  
1081 **tissues and stress conditions.** RNAseq datasets of (A) Tissues and developmental stages (B)  
1082 Abiotic (phosphate starvation, heat and drought stress) and (C) Biotic stress conditions were  
1083 used. The expression values were obtained from expVIP database in the form of TPM values  
1084 and ratios of stressed to control condition were used to generate heatmaps using MeV  
1085 software. Green and red colors represent down-regulation and up-regulation of the genes in  
1086 the specific stresses, as shown by the color bar.

1087

1088 **Supplementary Figure S10: Flow representation of the preparation and extraction of**  
1089 **polysaccharides (Arabinogalactans, Arabinoxylans and Cellulose) from the shoots of**  
1090 *Arabidopsis*.

1091

1092 **Supplementary Figure S11:** Standard graph for ABA measurement in plant leaves samples.  
1093 (A) Y-axis indicates Log of concentration and X-axis indicates the optical density. Data was  
1094 linearised by plotting the log of the target antigen concentrations versus the log of the OD and  
1095 the best fit line was determined by regression analysis. (B) Panel showing the colour  
1096 development for the quantitation of the ABA in different leaf samples, OD was taken at 420  
1097 nm.

1098

1099 **Supplementary Table S1:** List of *TaVIH* genes with computed physical and chemical  
1100 parameters. The molecular weight and isoelectric point prediction were done using Expasy  
1101 ProtParam tool (<https://web.expasy.org/protparam/>). The sub-cellular localization prediction  
1102 was done using WoLF PSORT prediction tool (<http://www.genscript.com/wolf-psort.html>).  
1103 RefSeq v1.1 for wheat Ensembl Plants was used for gene ID.

1104 **Supplementary Table S2:** List of genes up- and down-regulated in #line4 (Sheets1,2) and  
1105 line6 (Sheets3,4) w.r.t. Col-0(Ev) lines. DEGs were obtained using the Kallisto-DESeq2  
1106 pipeline; genes with LFC > 1 in either direction and padj < 0.05 were considered to be  
1107 differentially regulated.

1108 **Supplementary Table S3:** List of drought responsive genes that are differentially regulated  
1109 in #line4 (Sheet1), #line6 (Sheet2), and differentially regulated in both #line4 and line6  
1110 (Sheet3). Drought responsive genes at 10days of drought stress w.r.t Control plants were  
1111 extracted from the SRA RNAseq dataset (SRP075287) using Cufflinks pipeline. Genes with  
1112  $1 > \text{LFC} < -1$  were considered to be drought responsive.

1113 **Supplementary Table S4:** List of primers used for this study

1114

1115

# Figure 1

bioRxiv preprint doi: <https://doi.org/10.1101/743294>; this version posted November 6, 2021. The copyright holder for this preprint (which was not certified by peer review) is the author/funder. All rights reserved. No reuse allowed without permission.

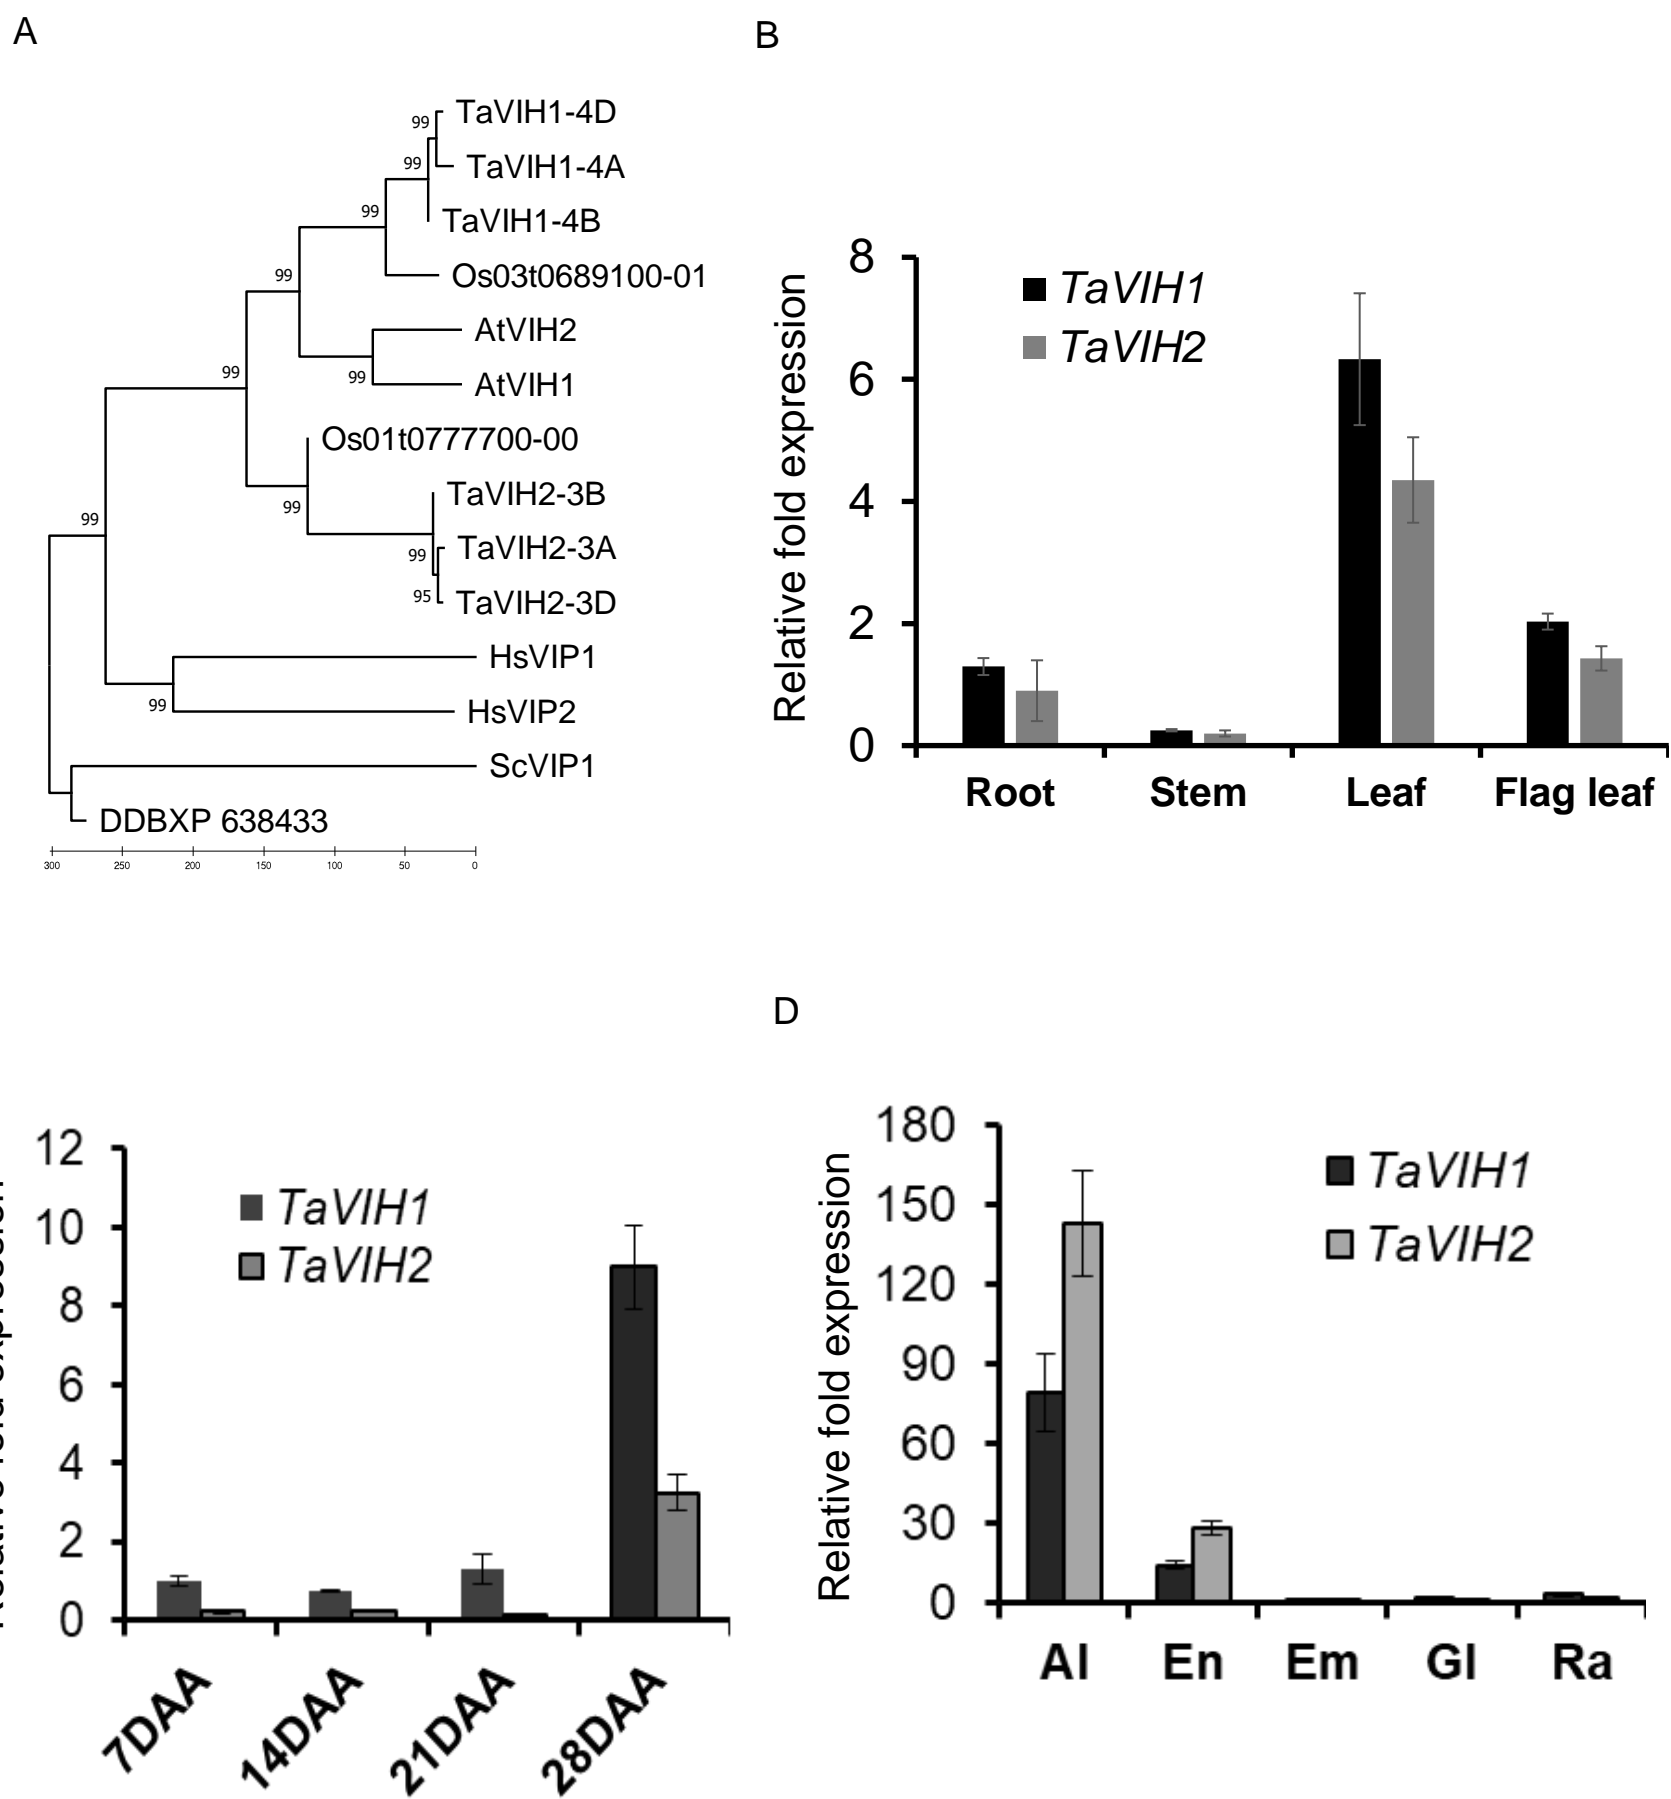

A

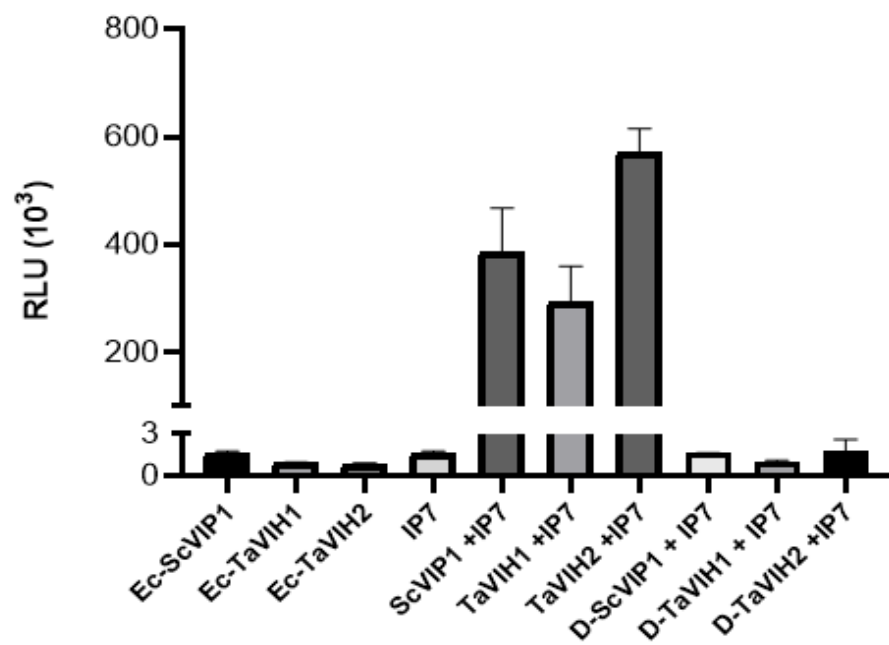

B

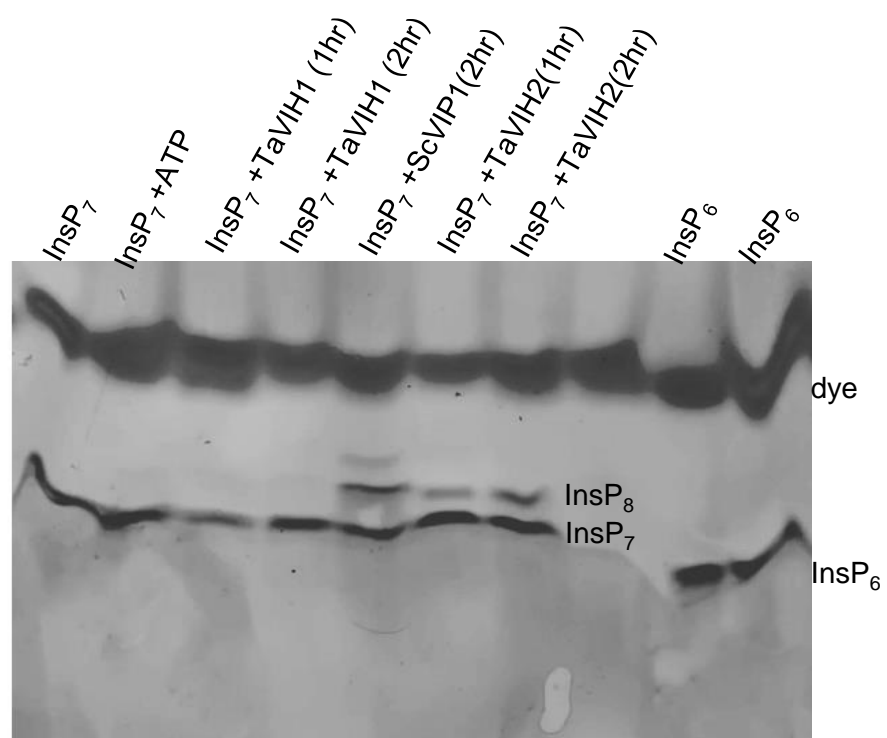

Figure 2

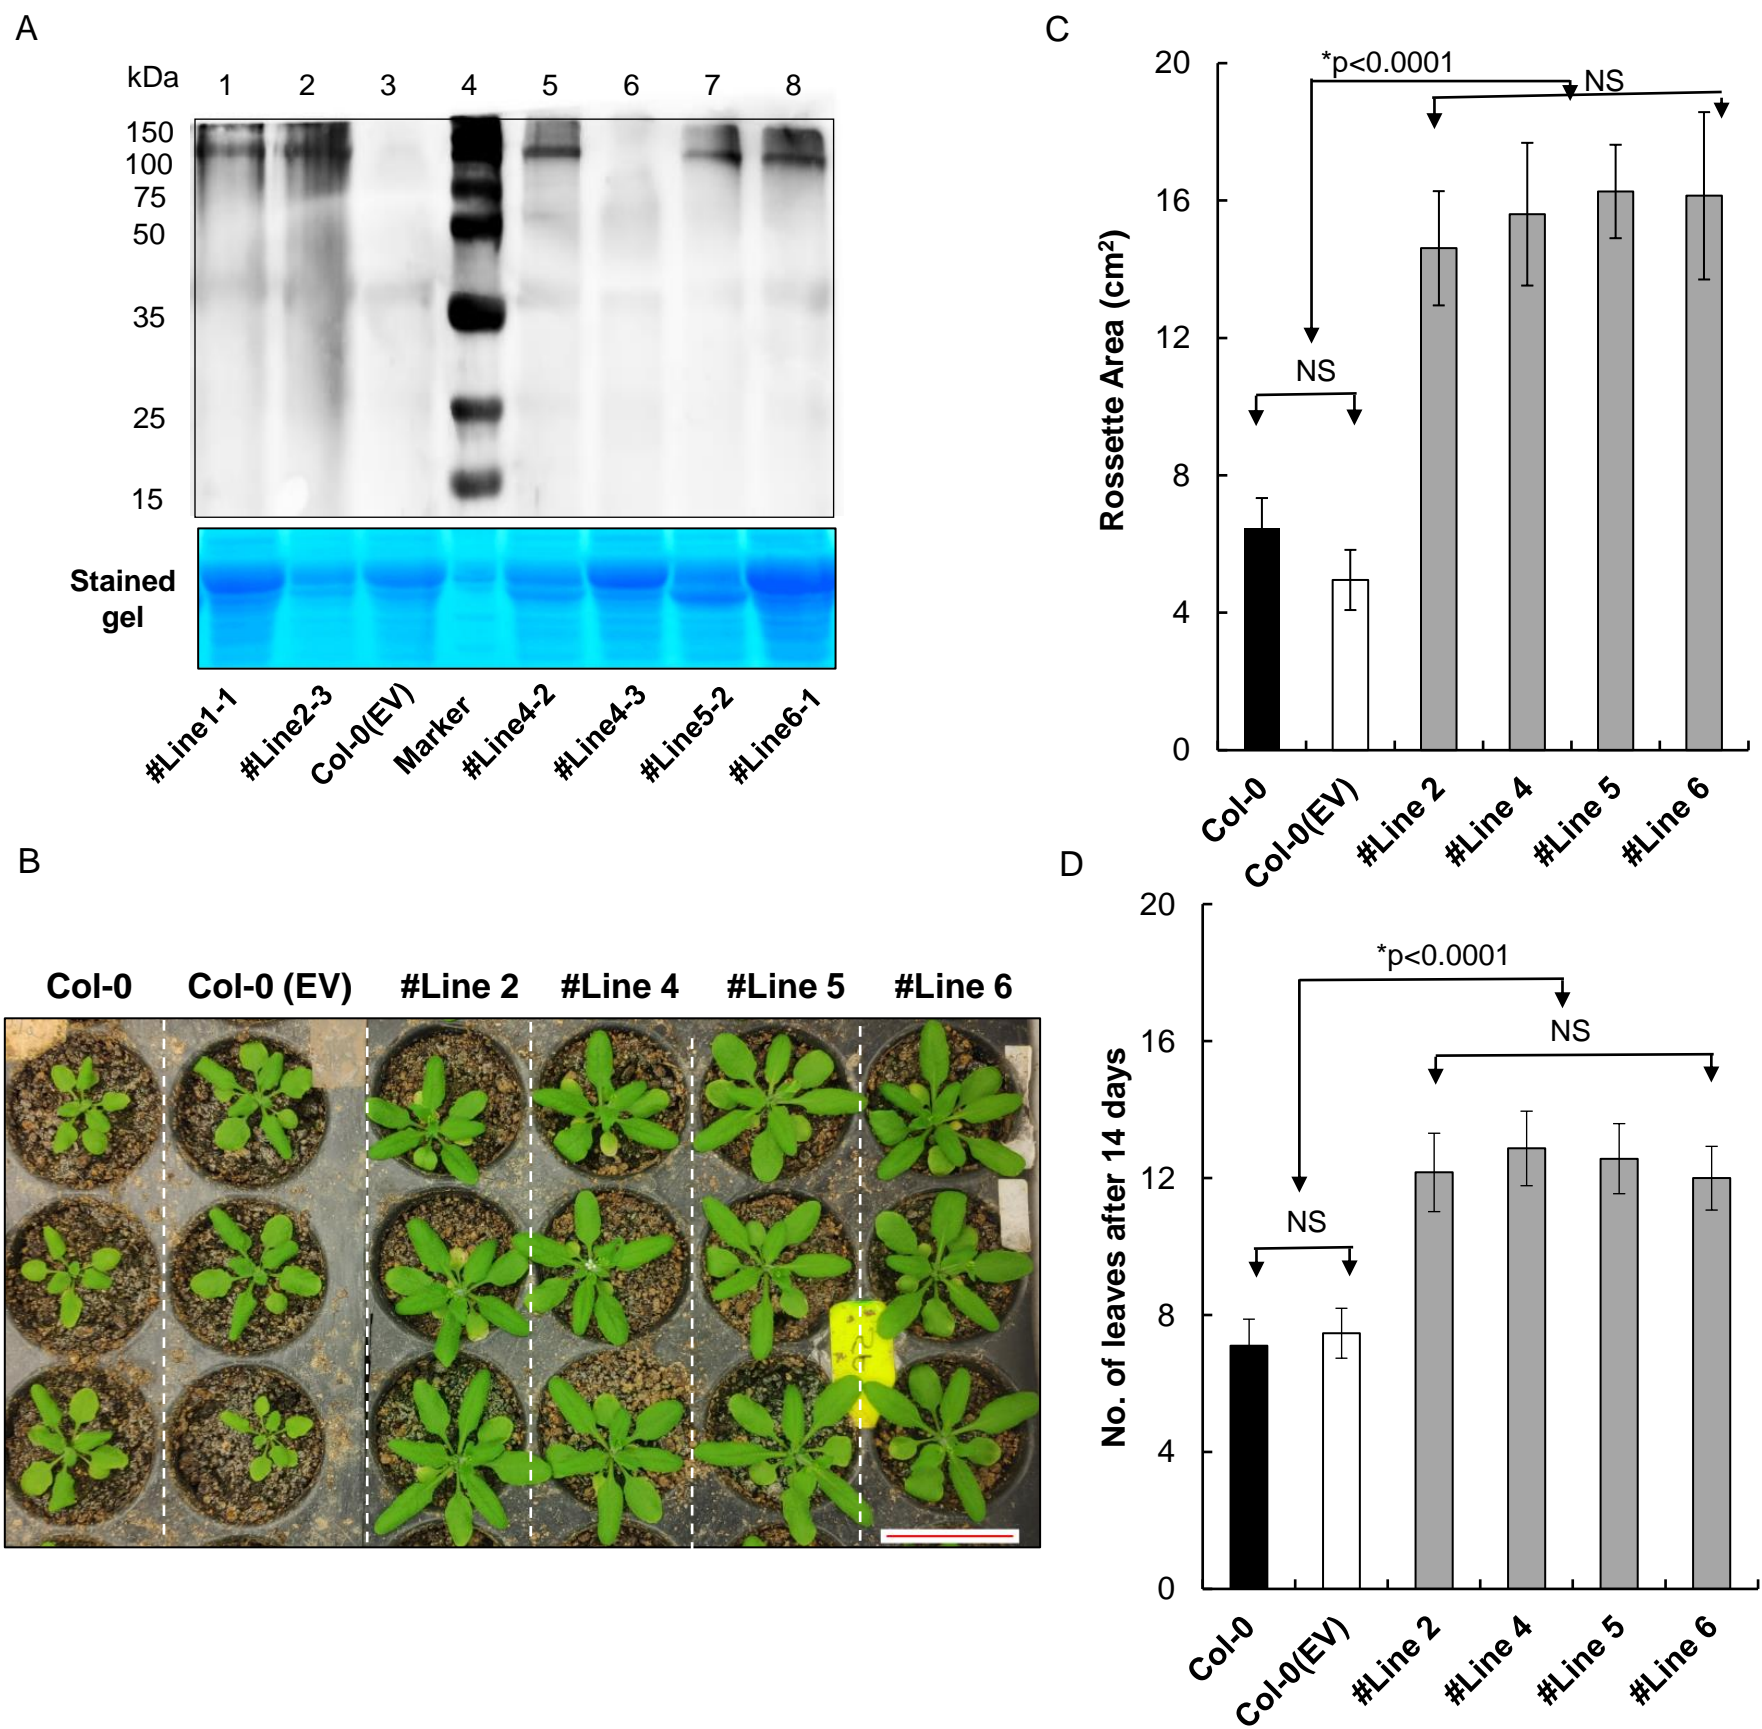

Figure 3



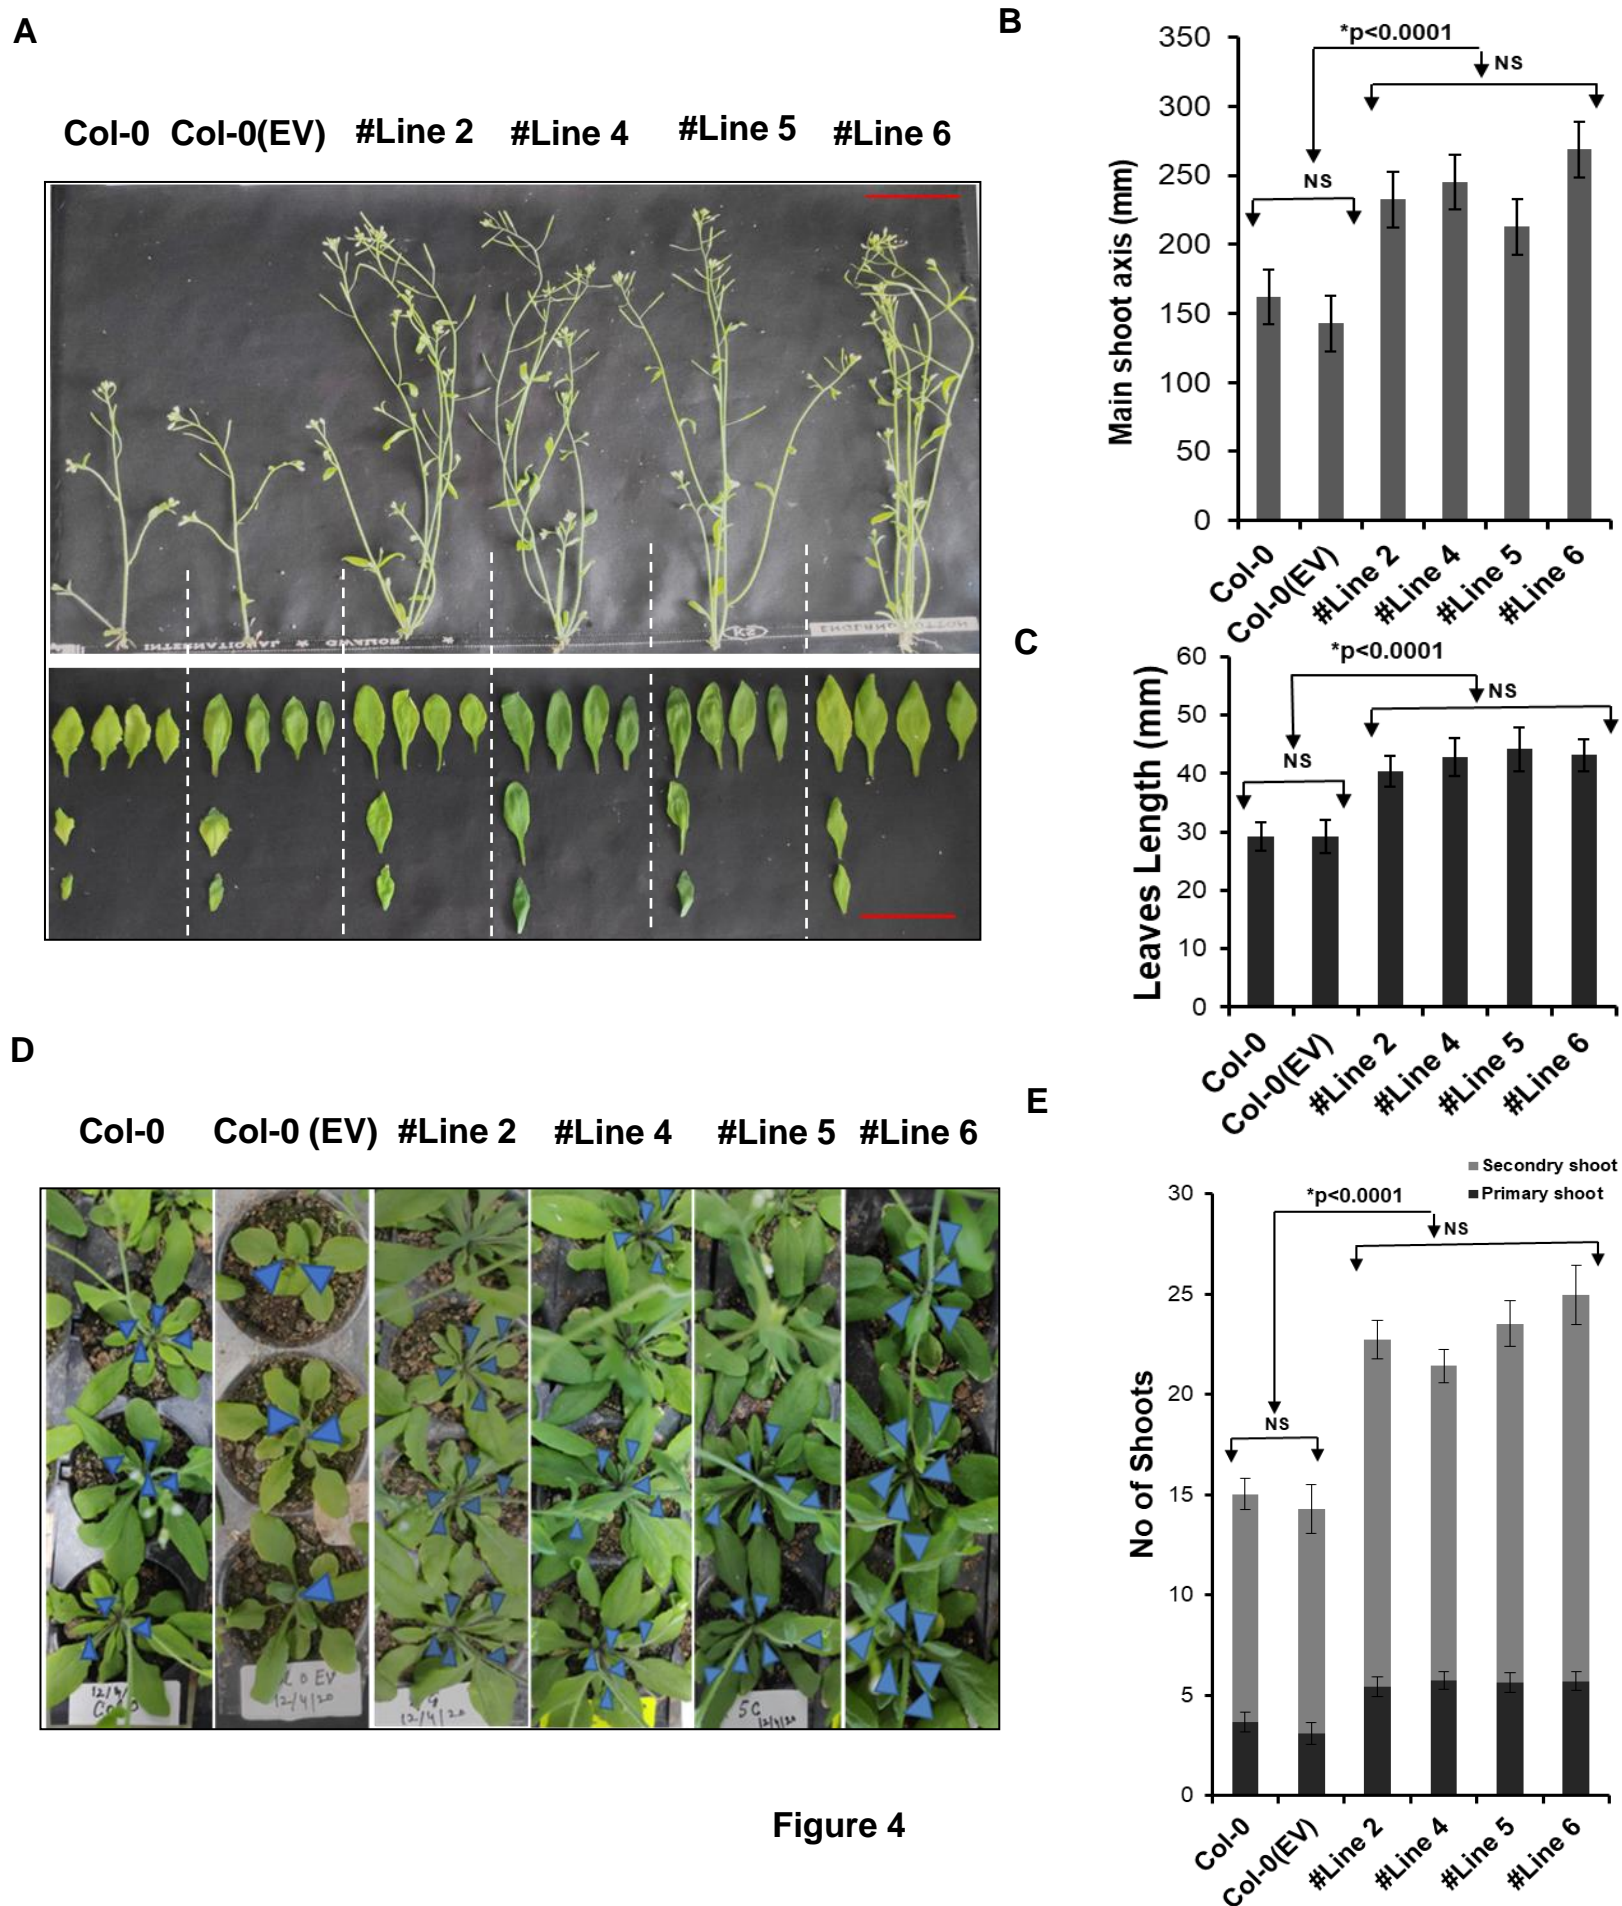

Figure 4

**A**

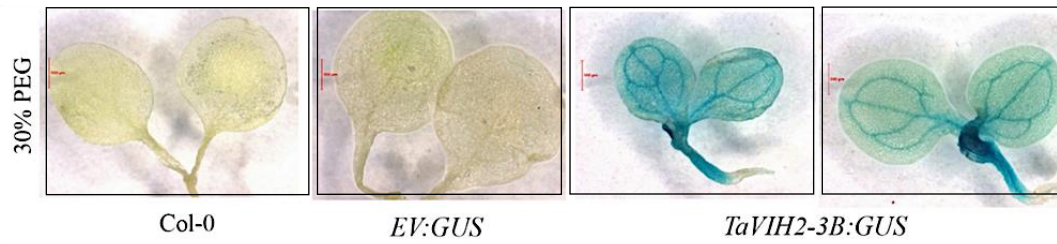

**B**

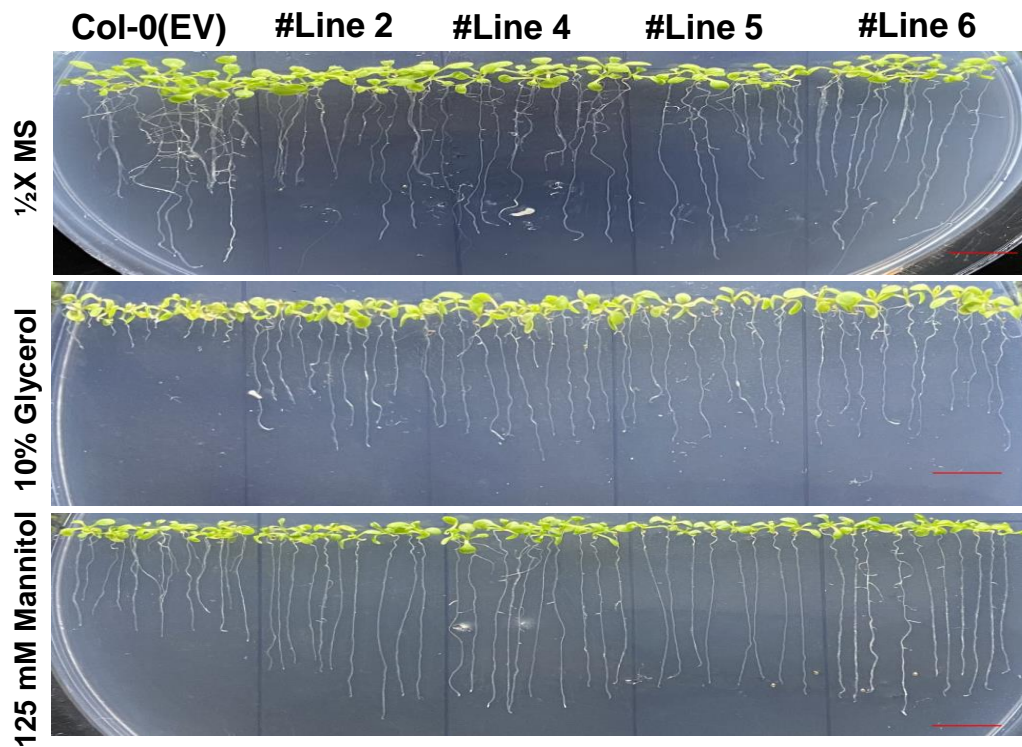

**C**

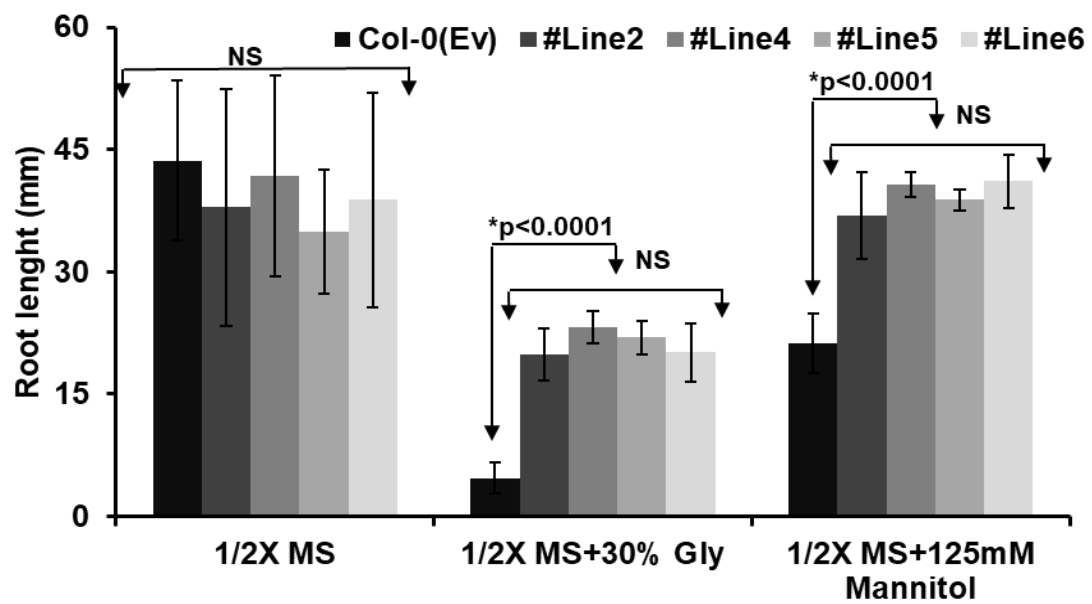

Figure 5

(A)

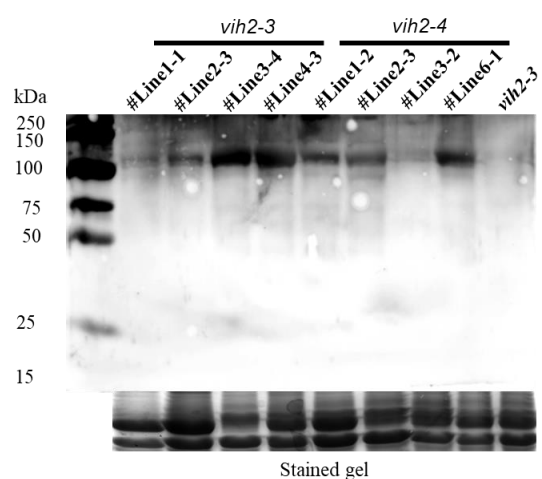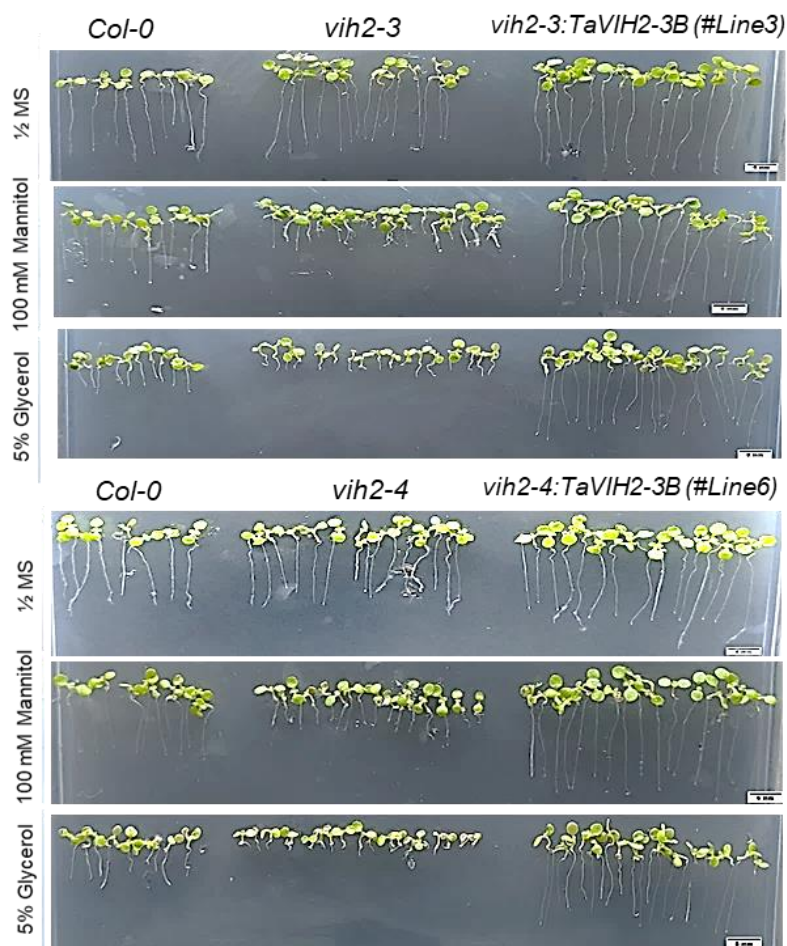

(C)

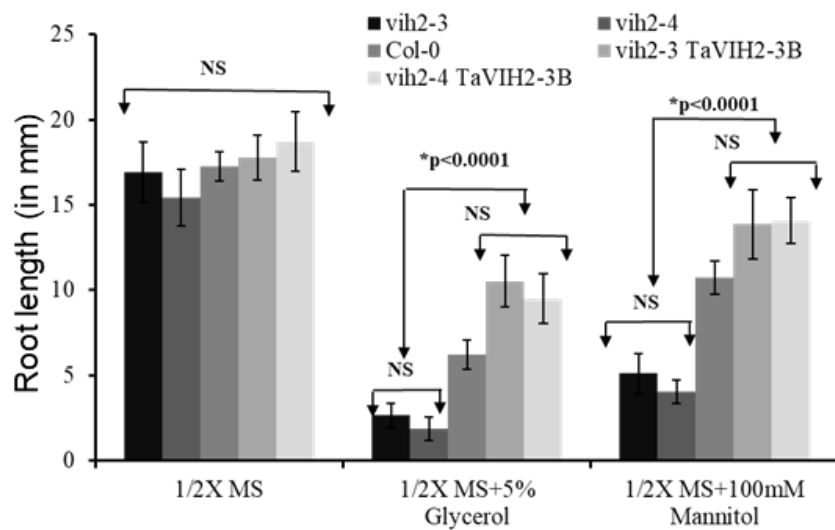

Figure 6

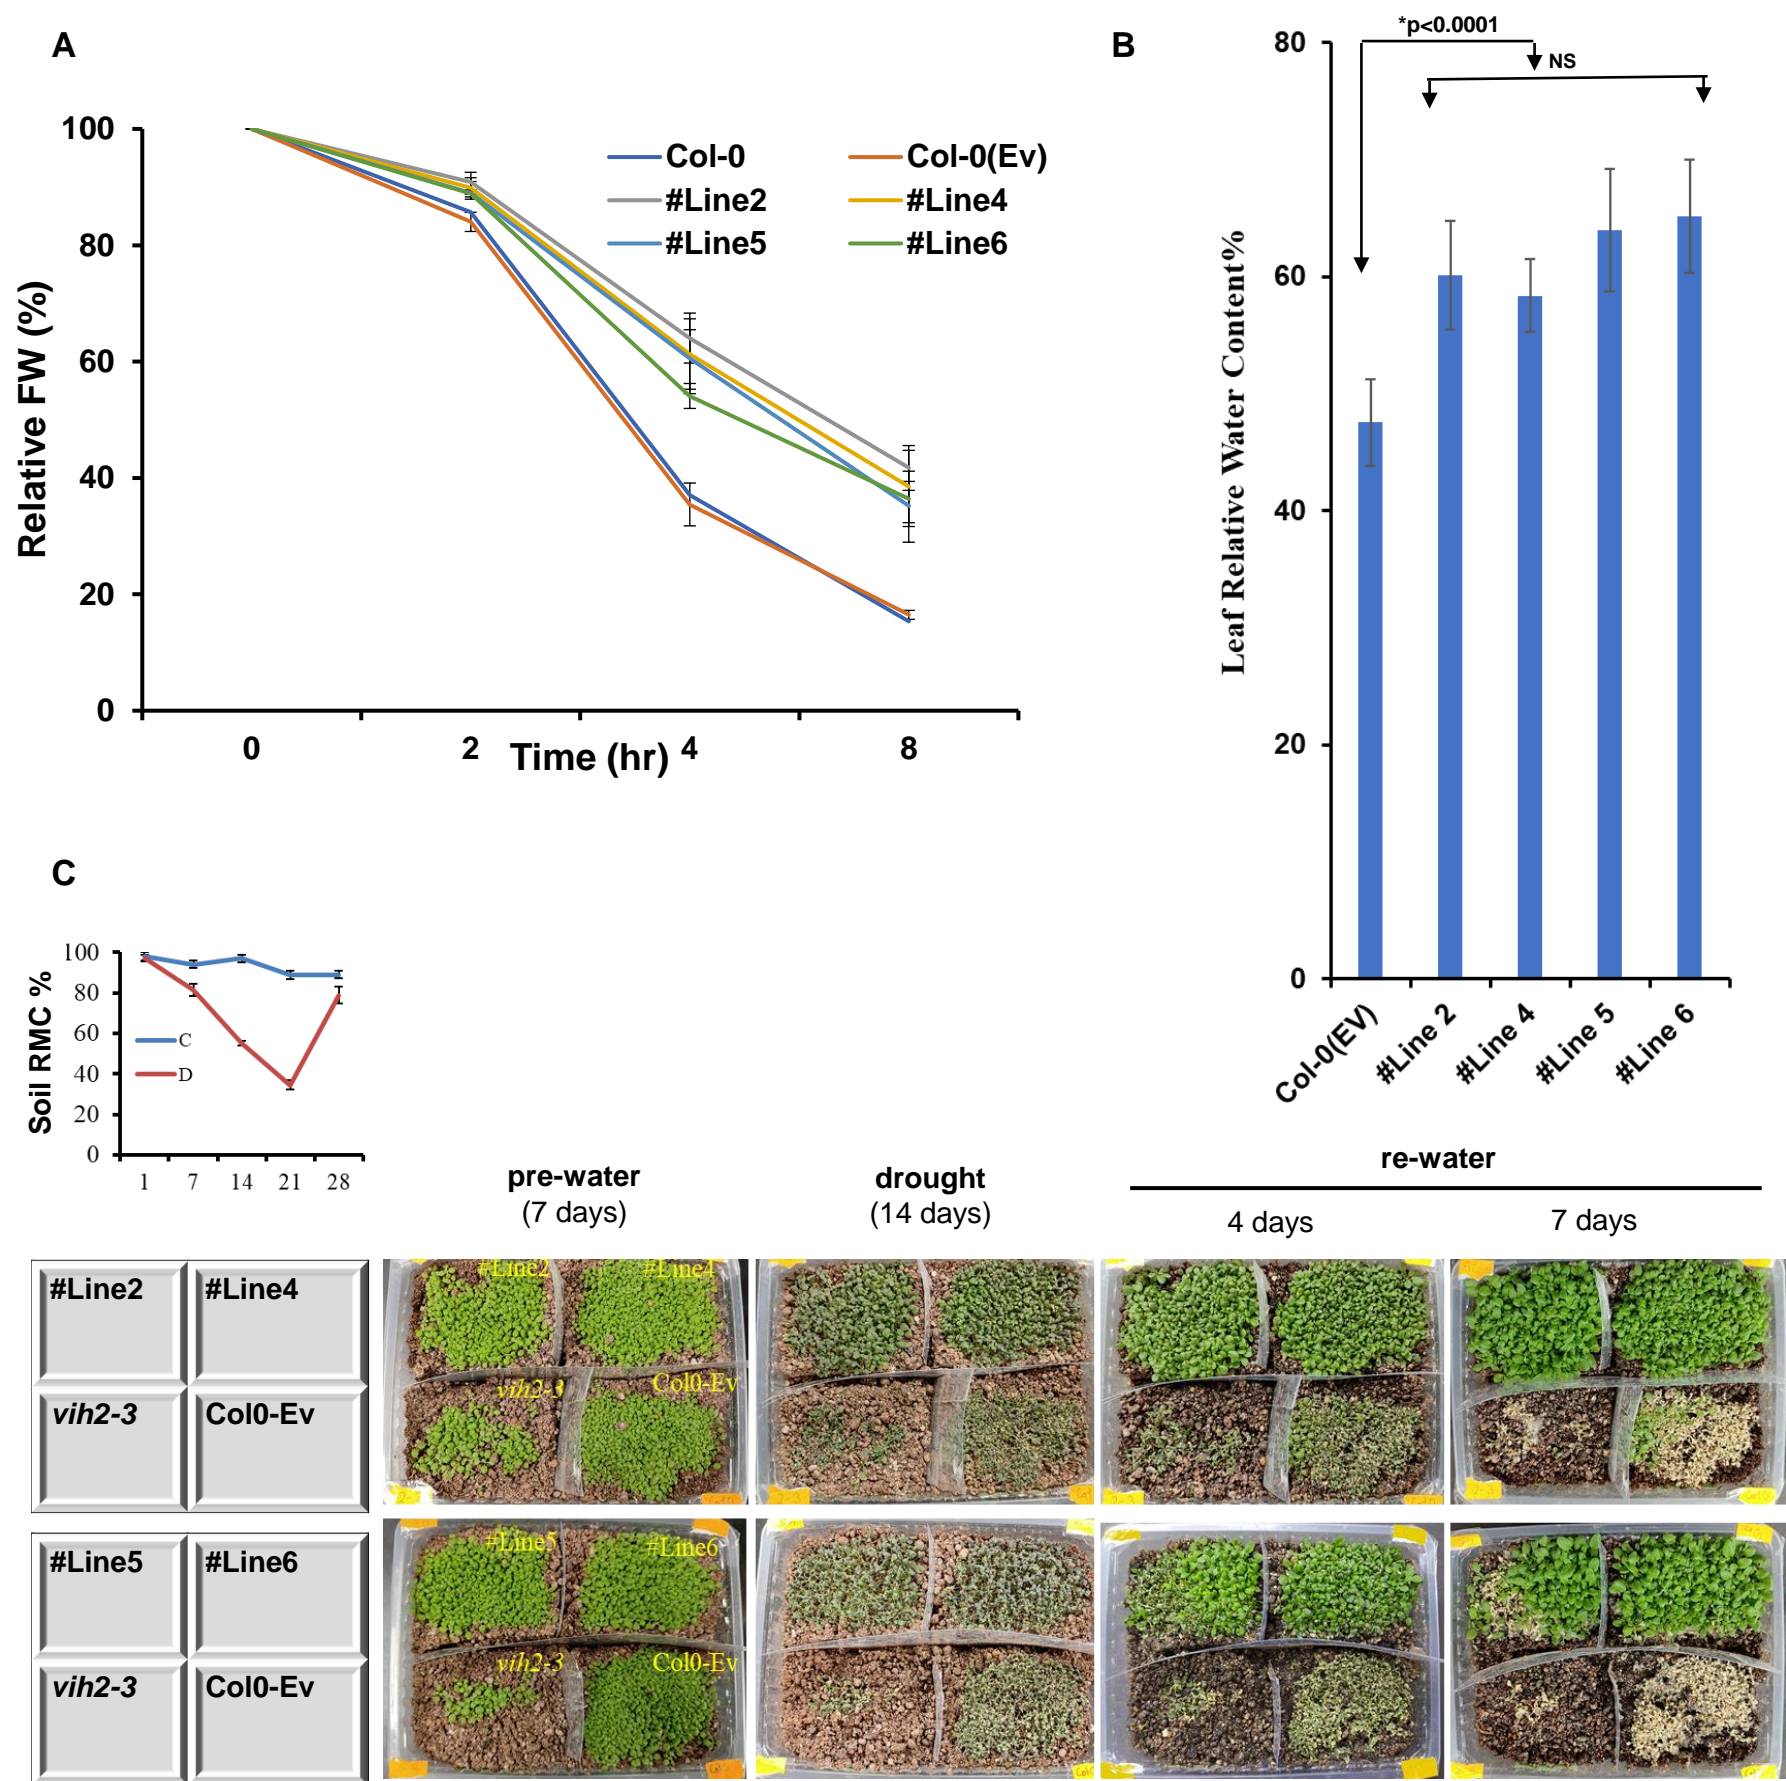

Figure 7

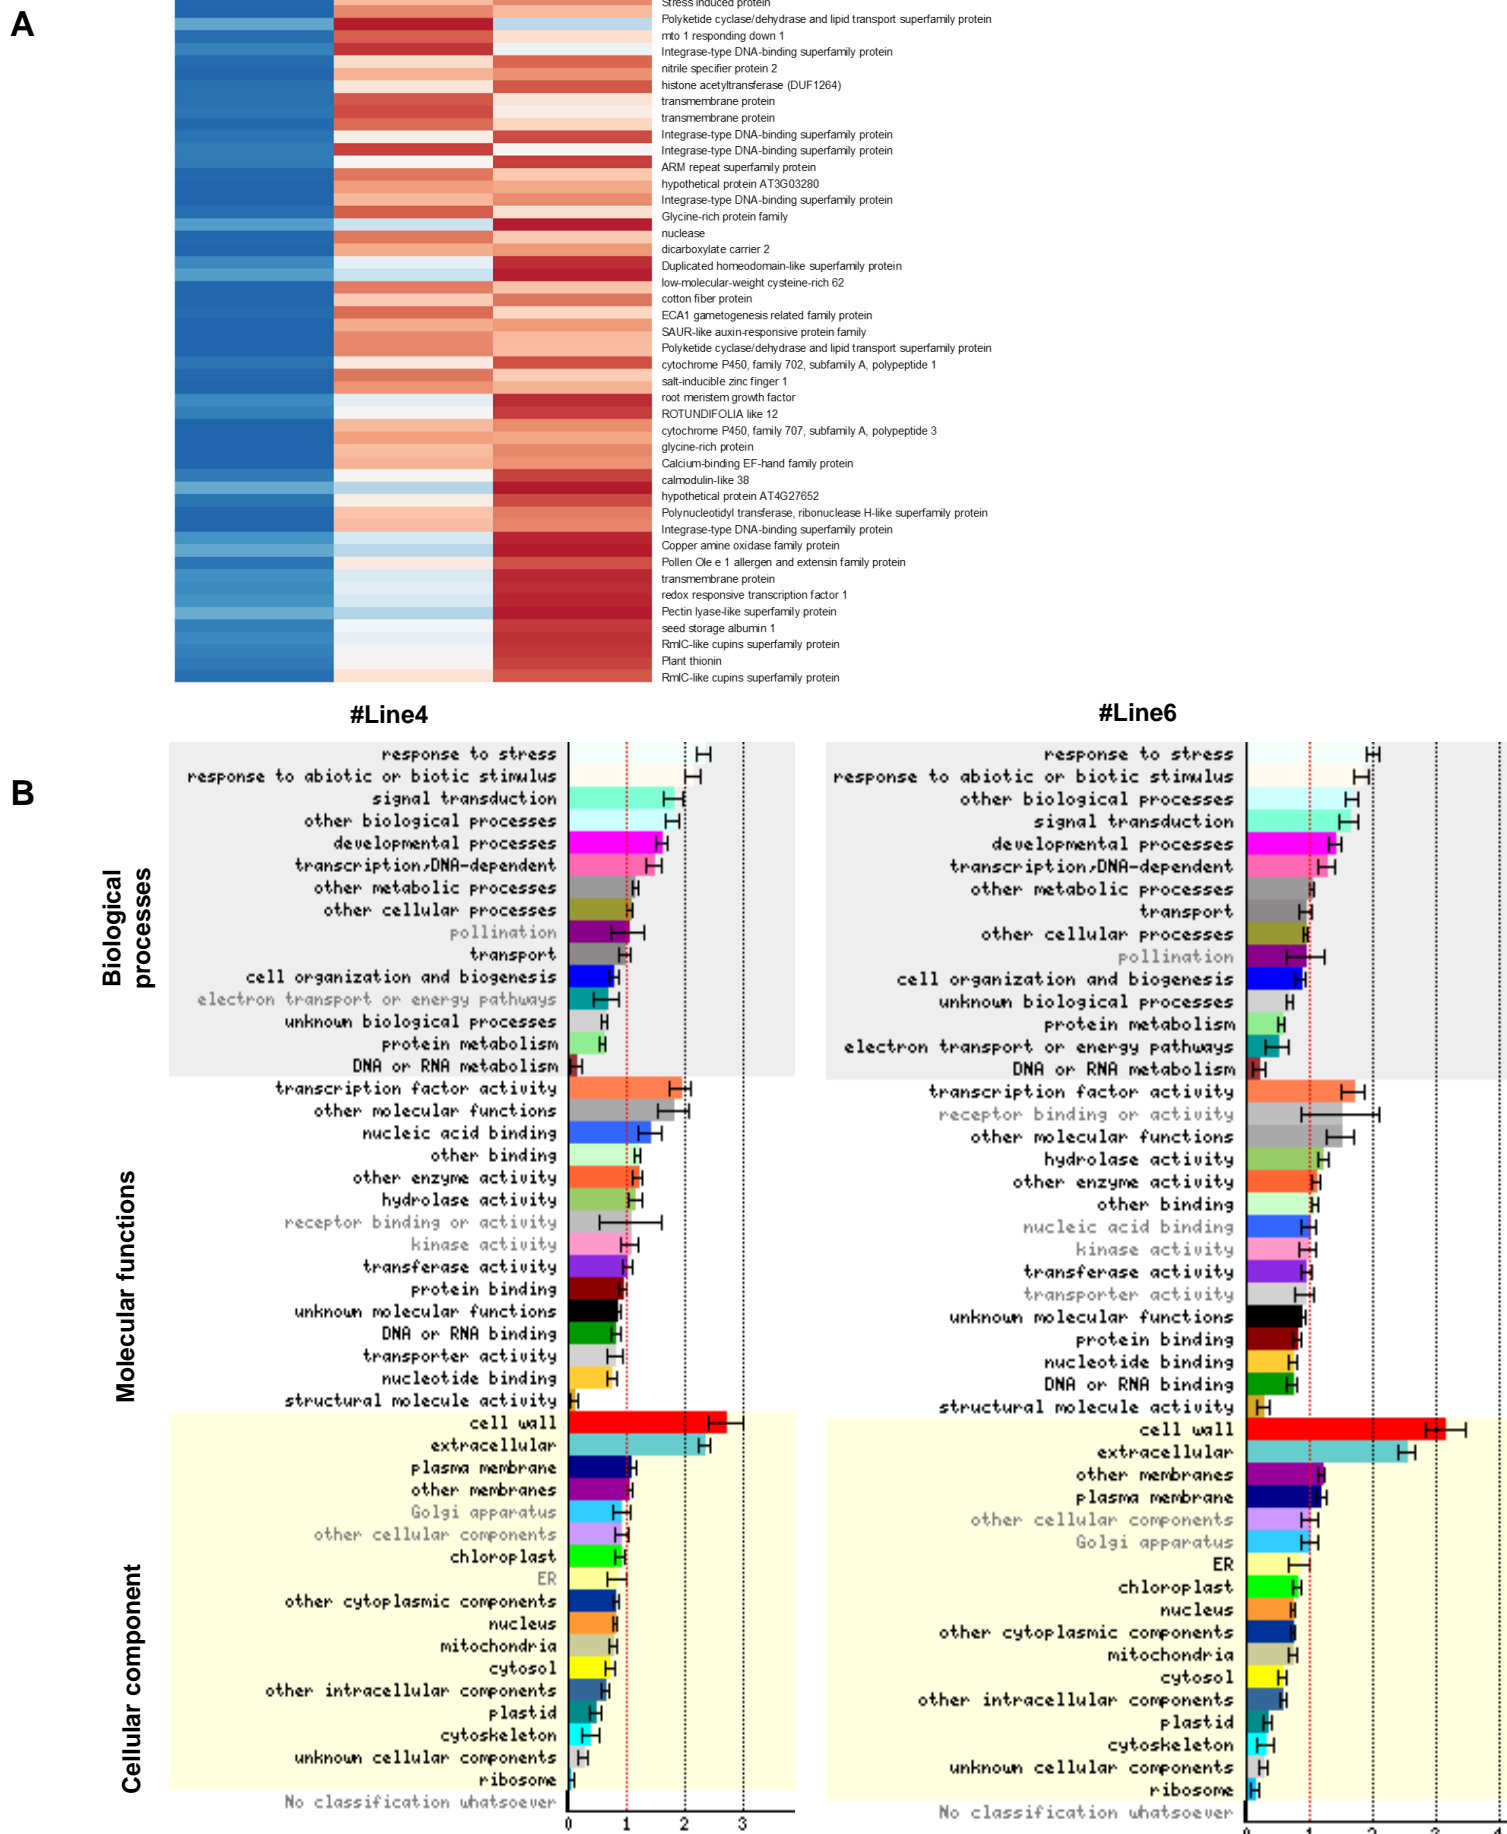

Figure 8

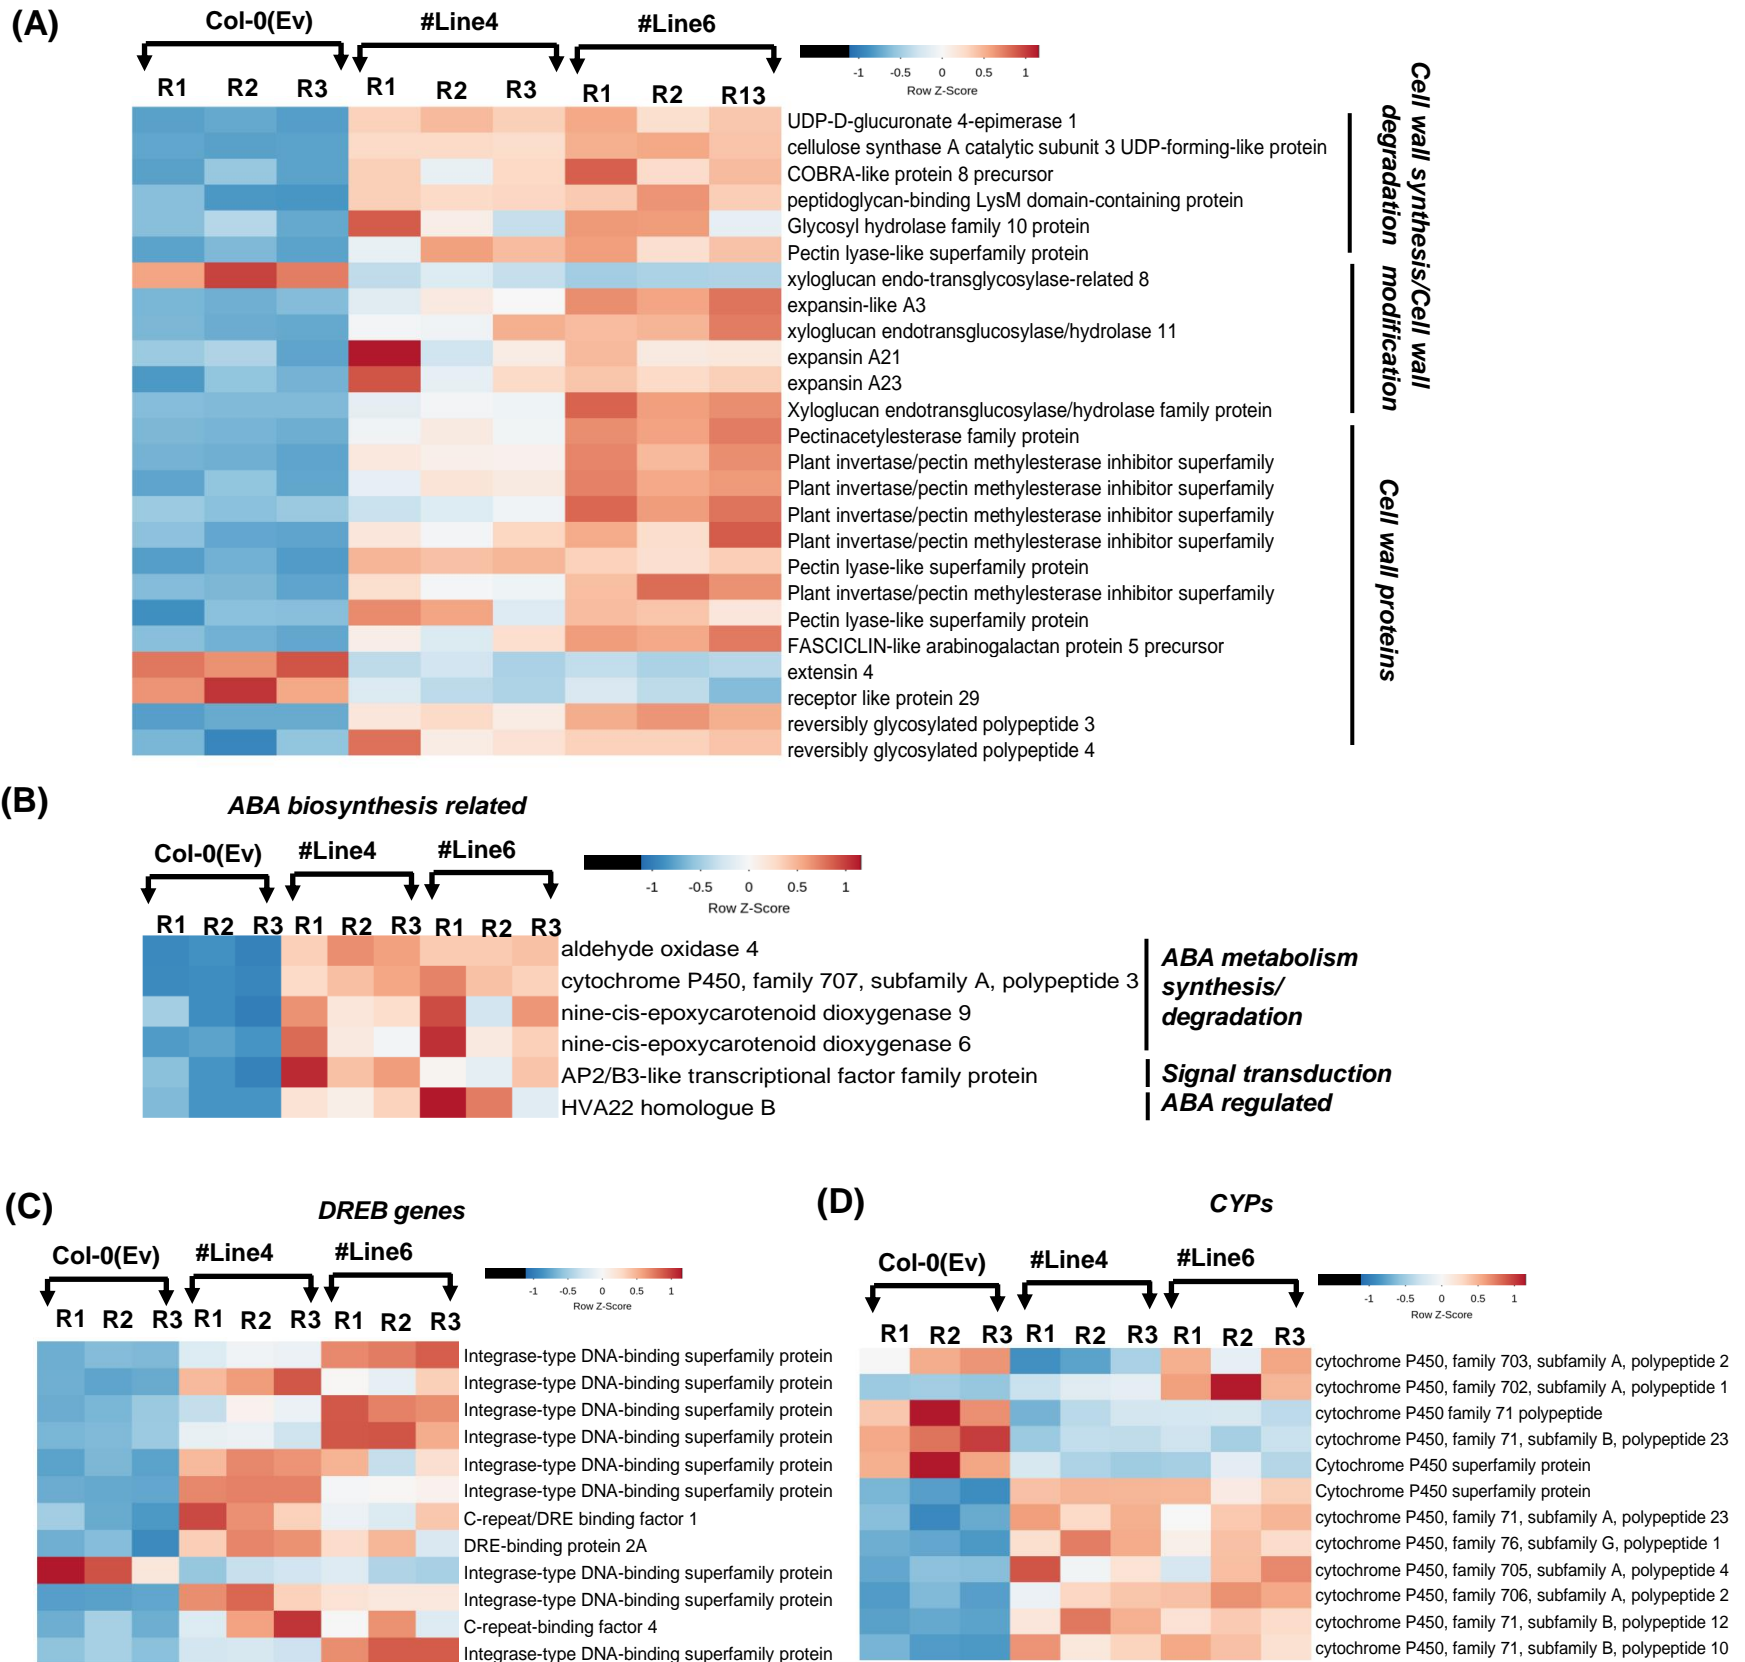

Figure 9

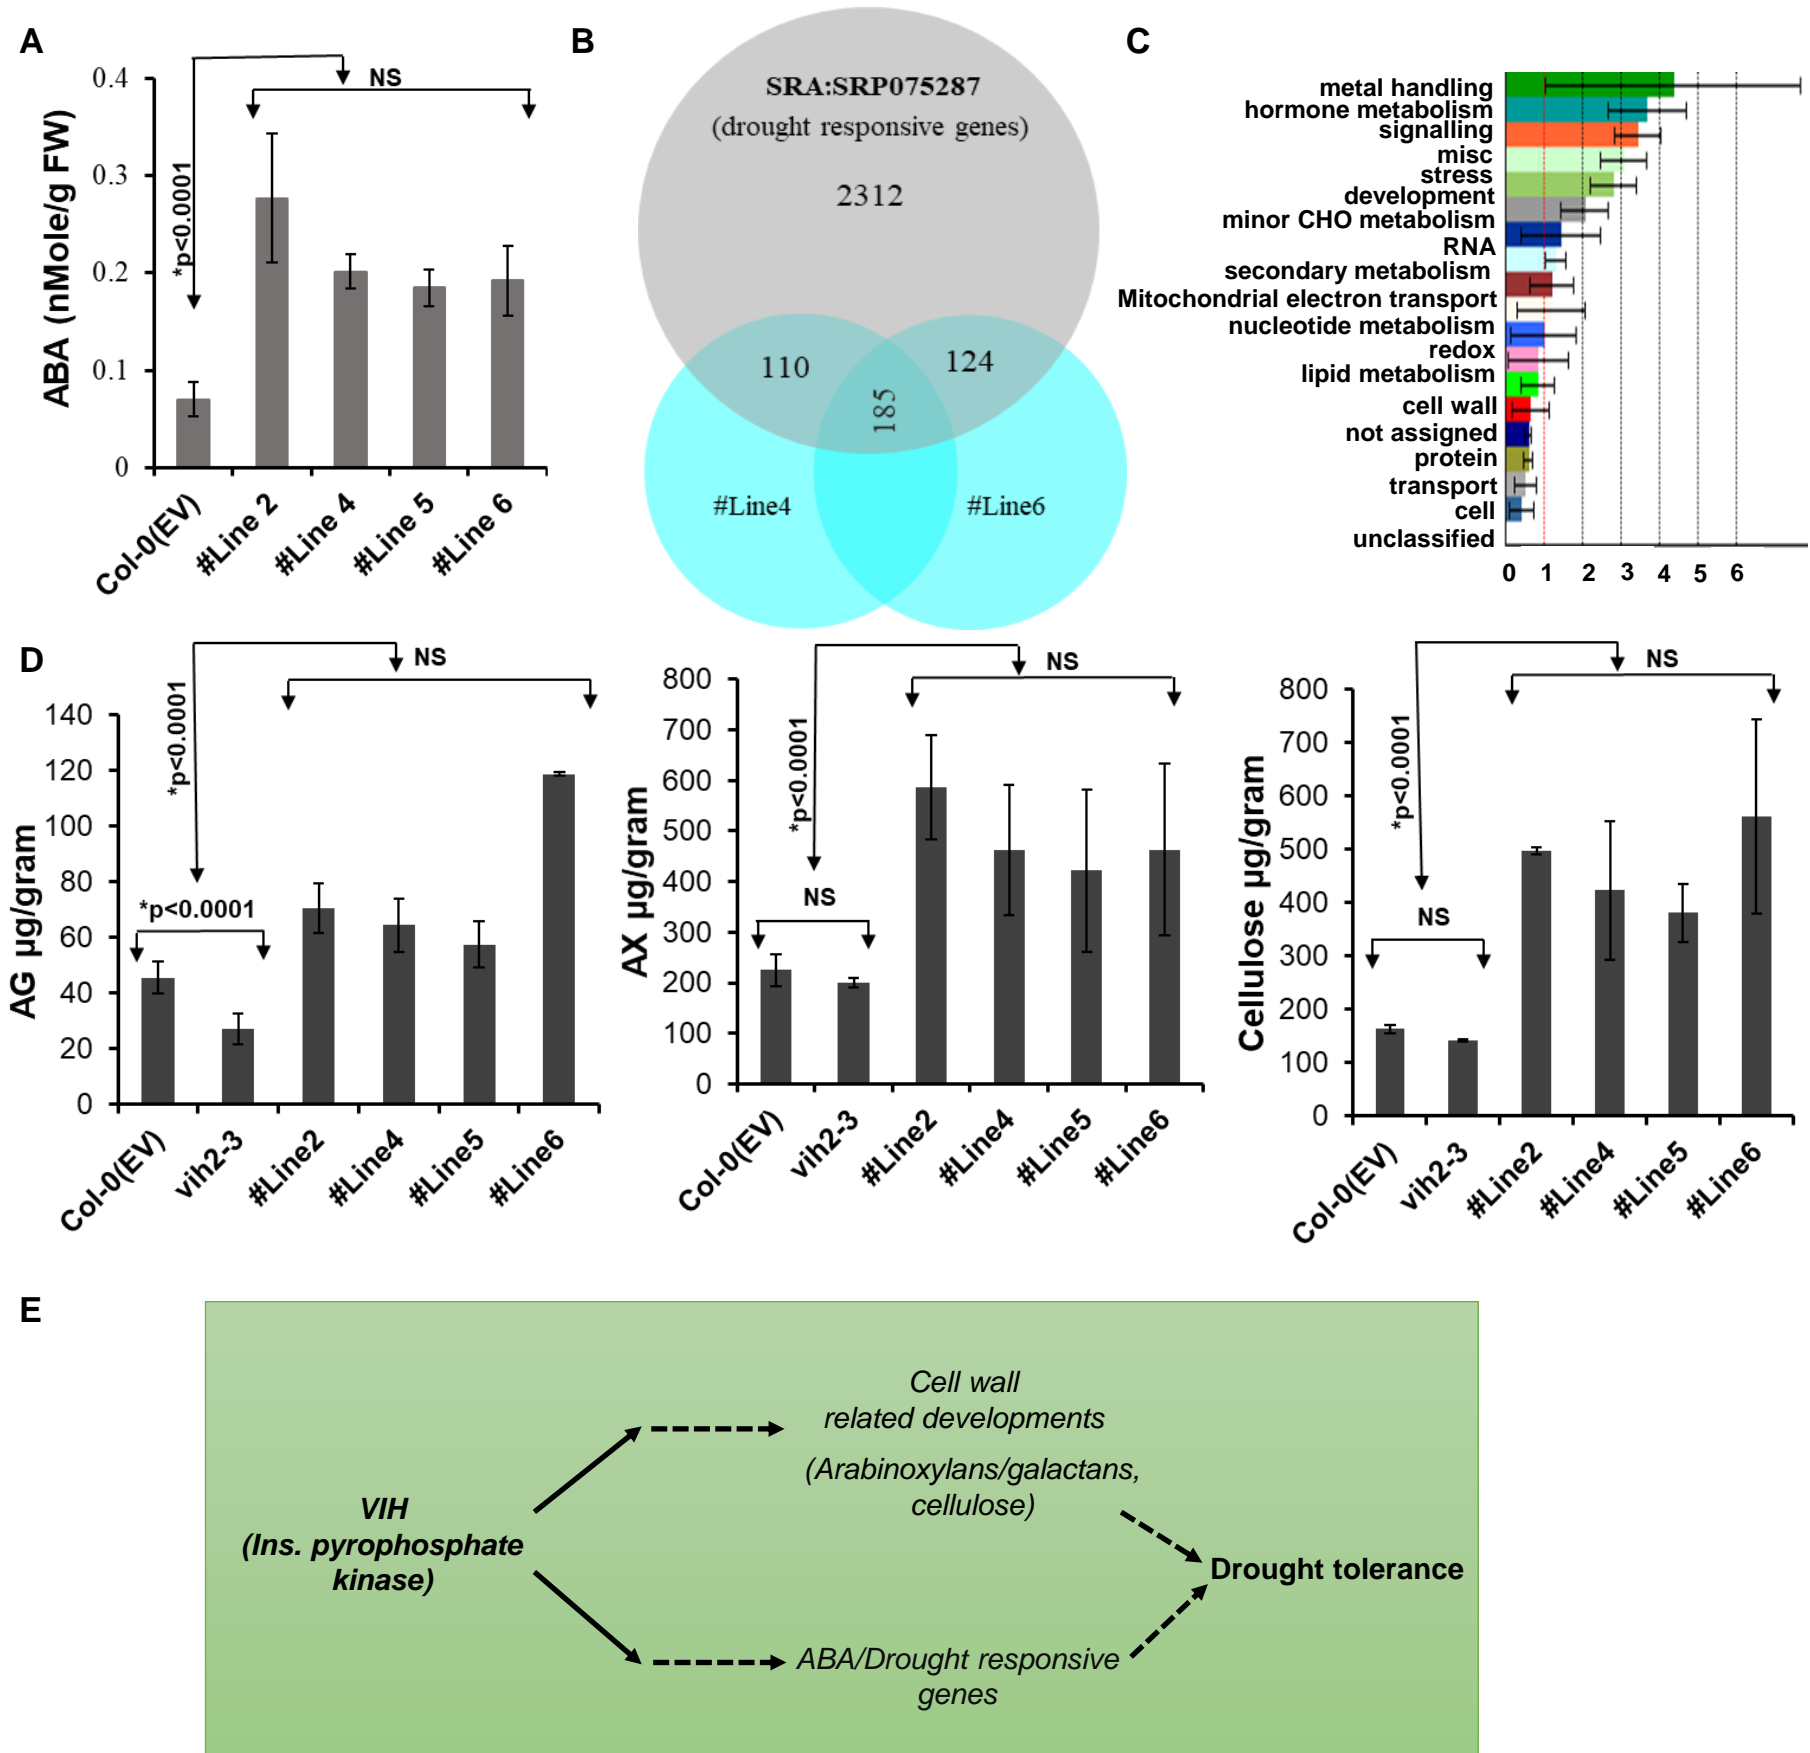

Figure 10
